# Supplementary material
Source: PubMed Central journal article supplement (PMC1808014)

Figure S1

A)

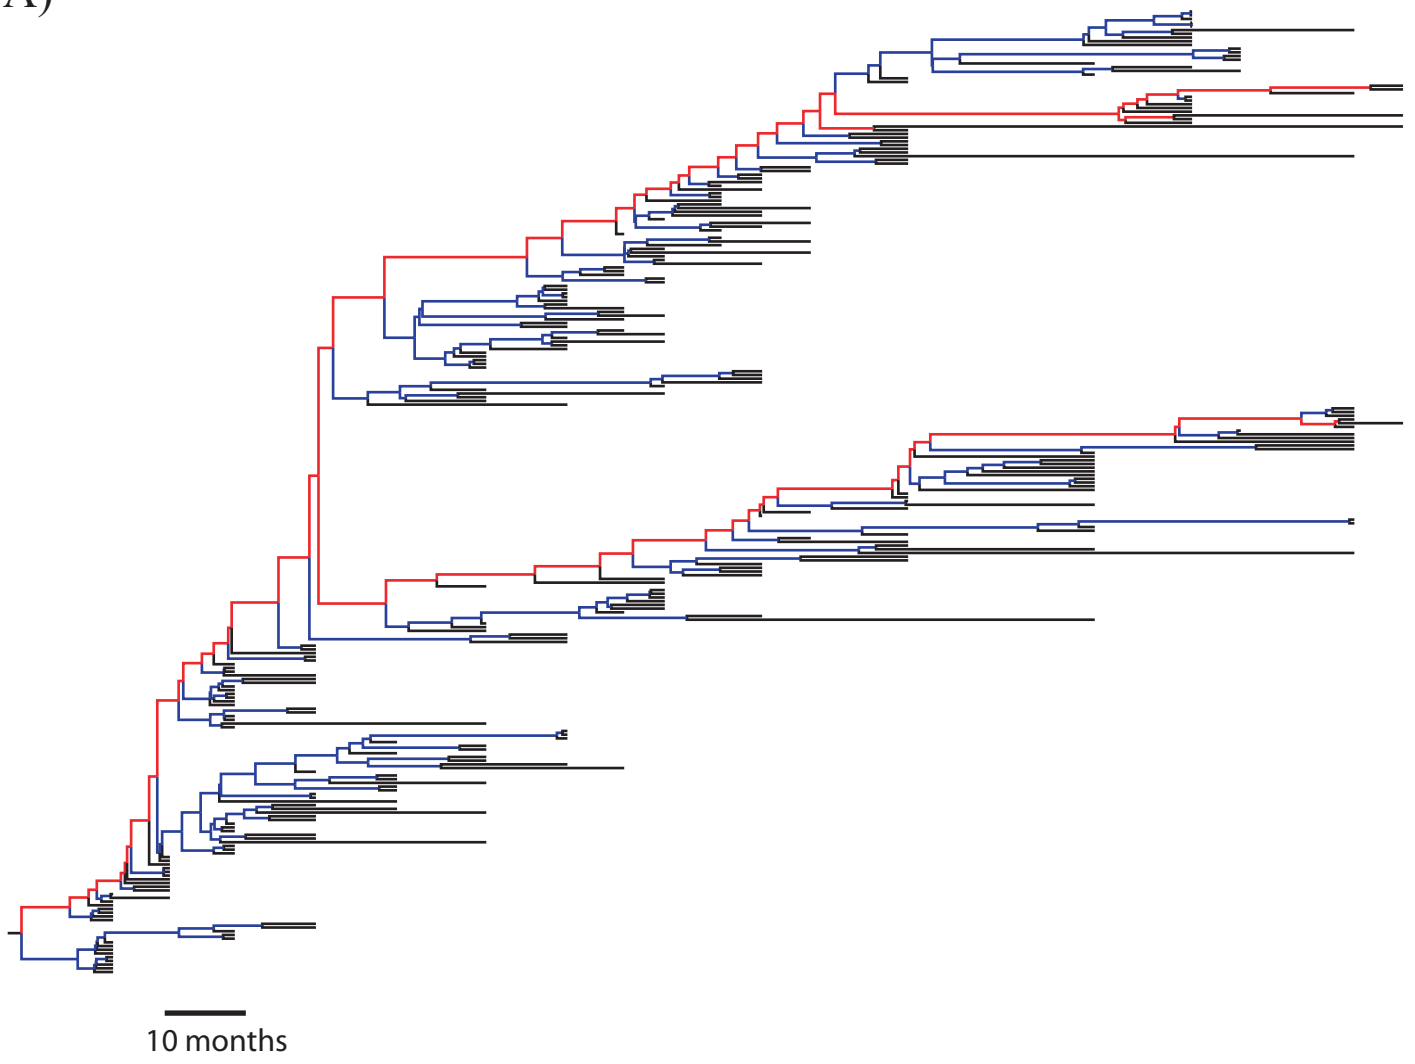

B)

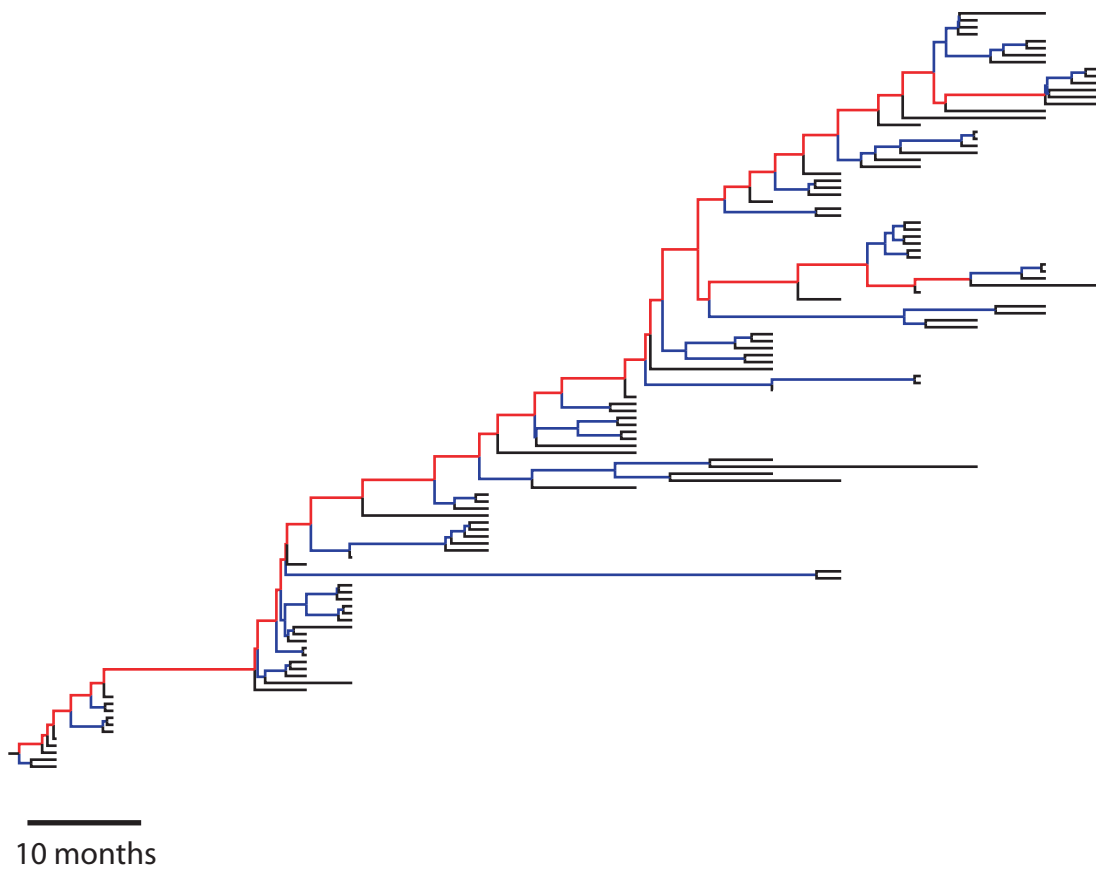

Figure S1

C)

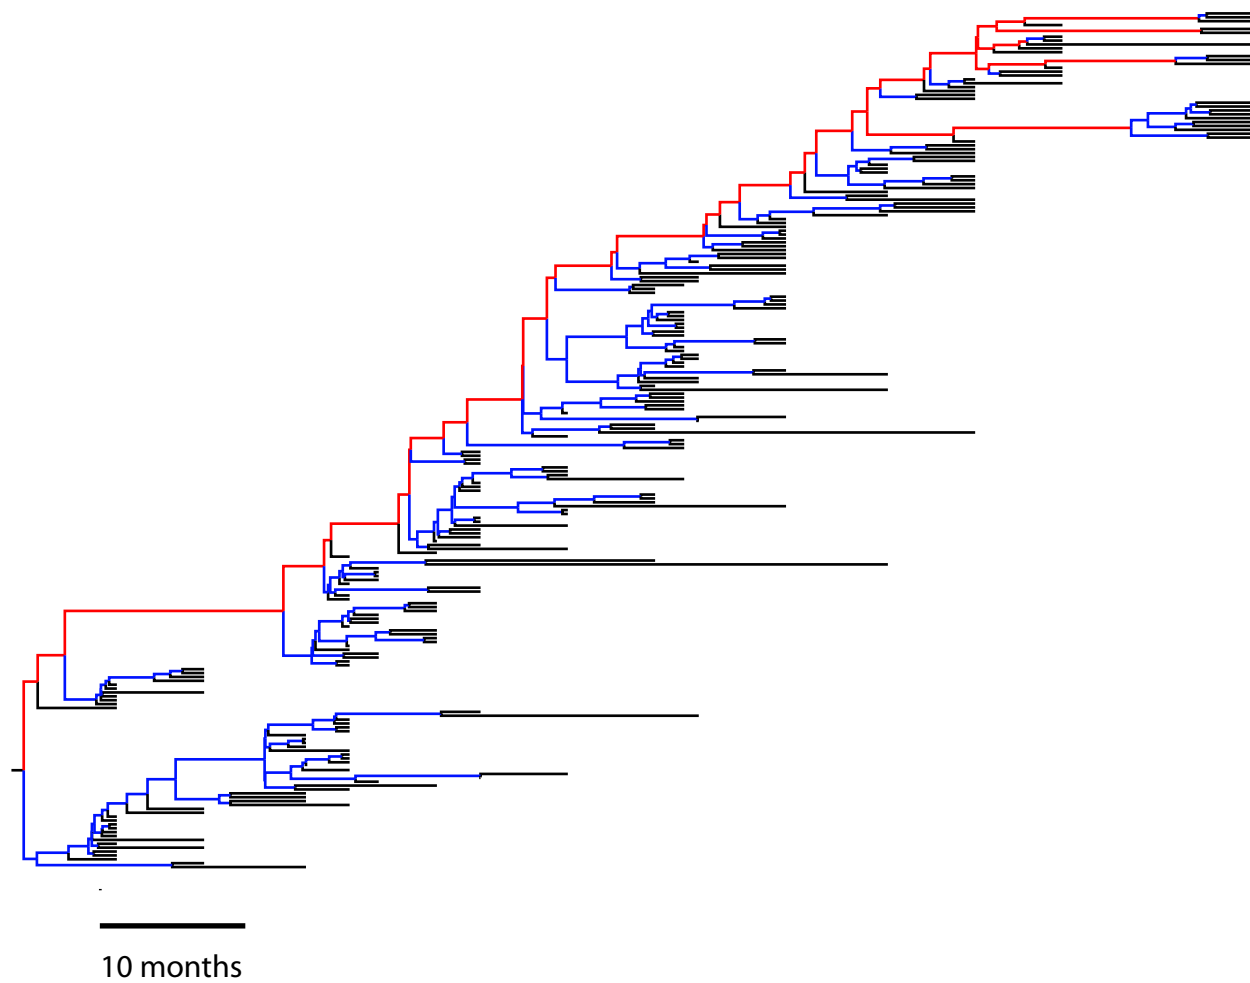

D)

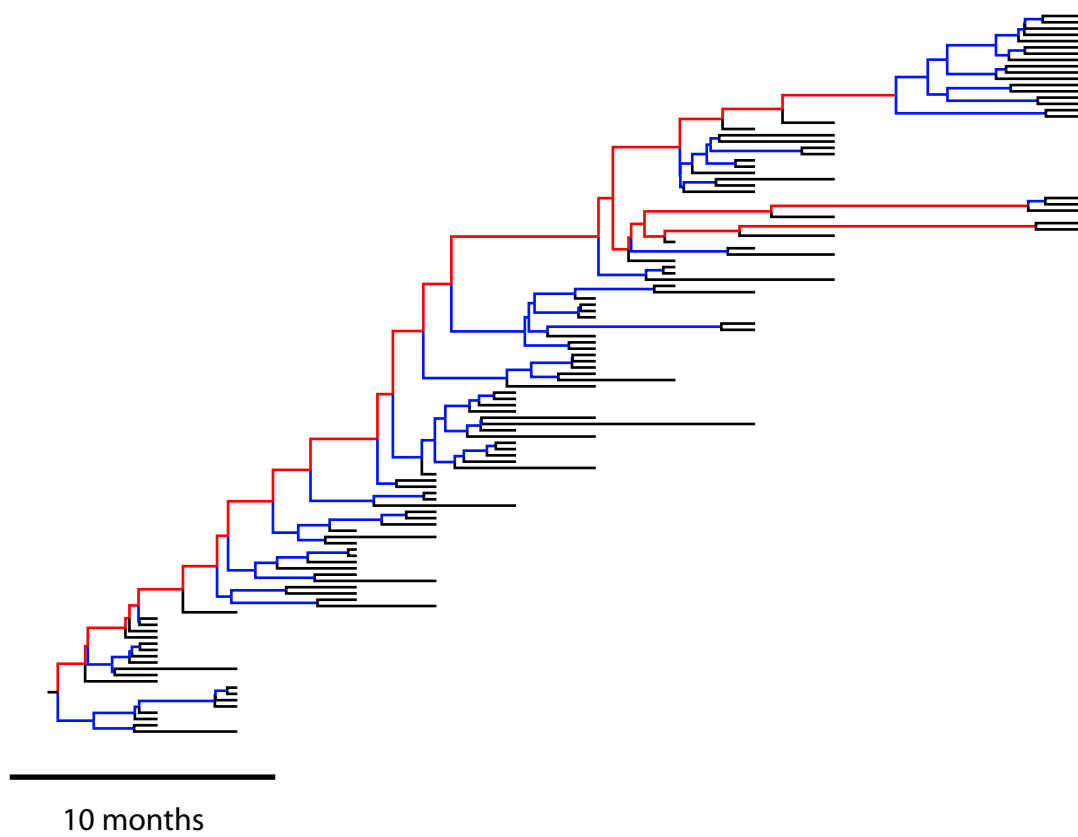

Figure S1

E)

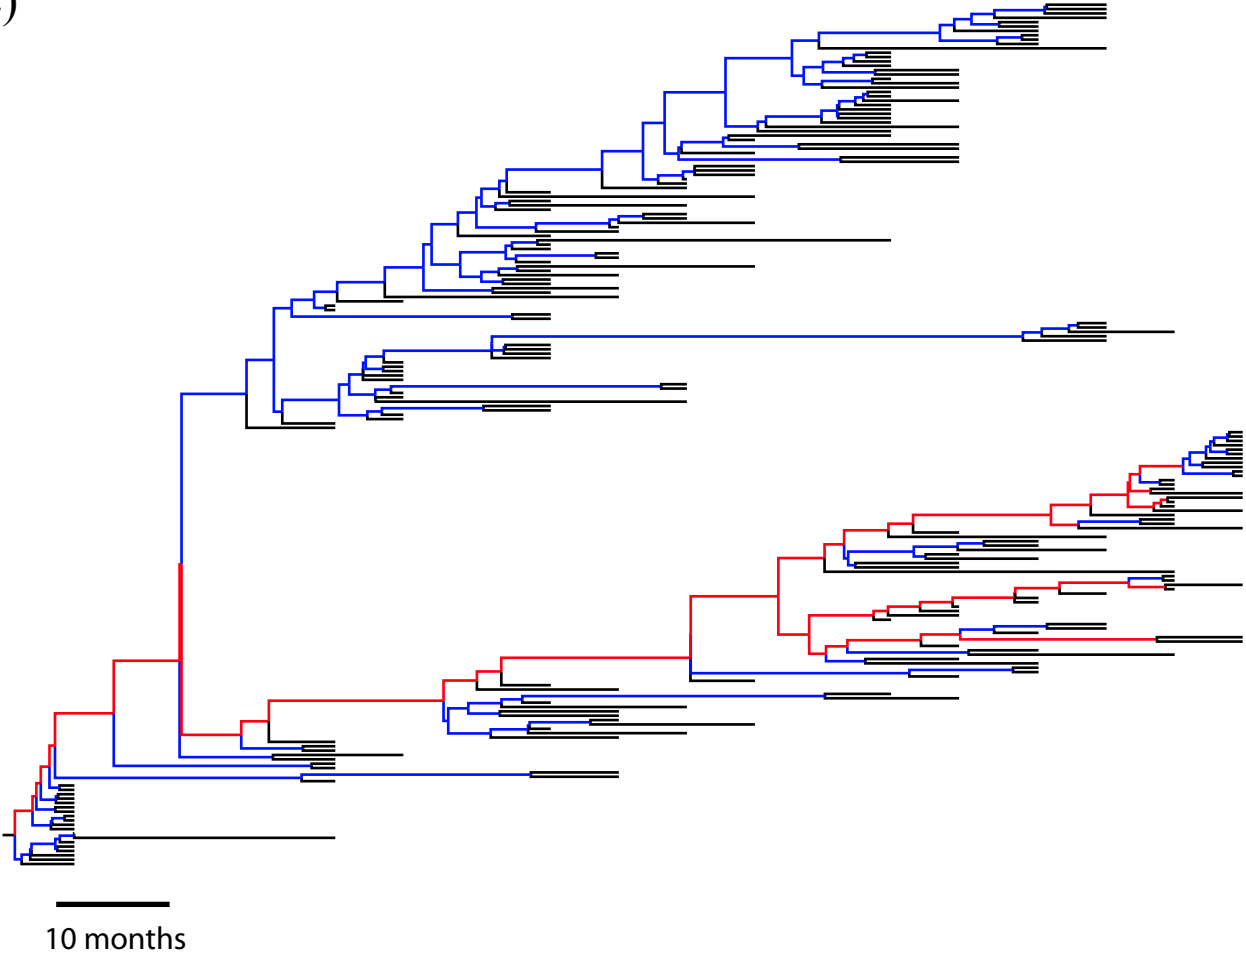

F)

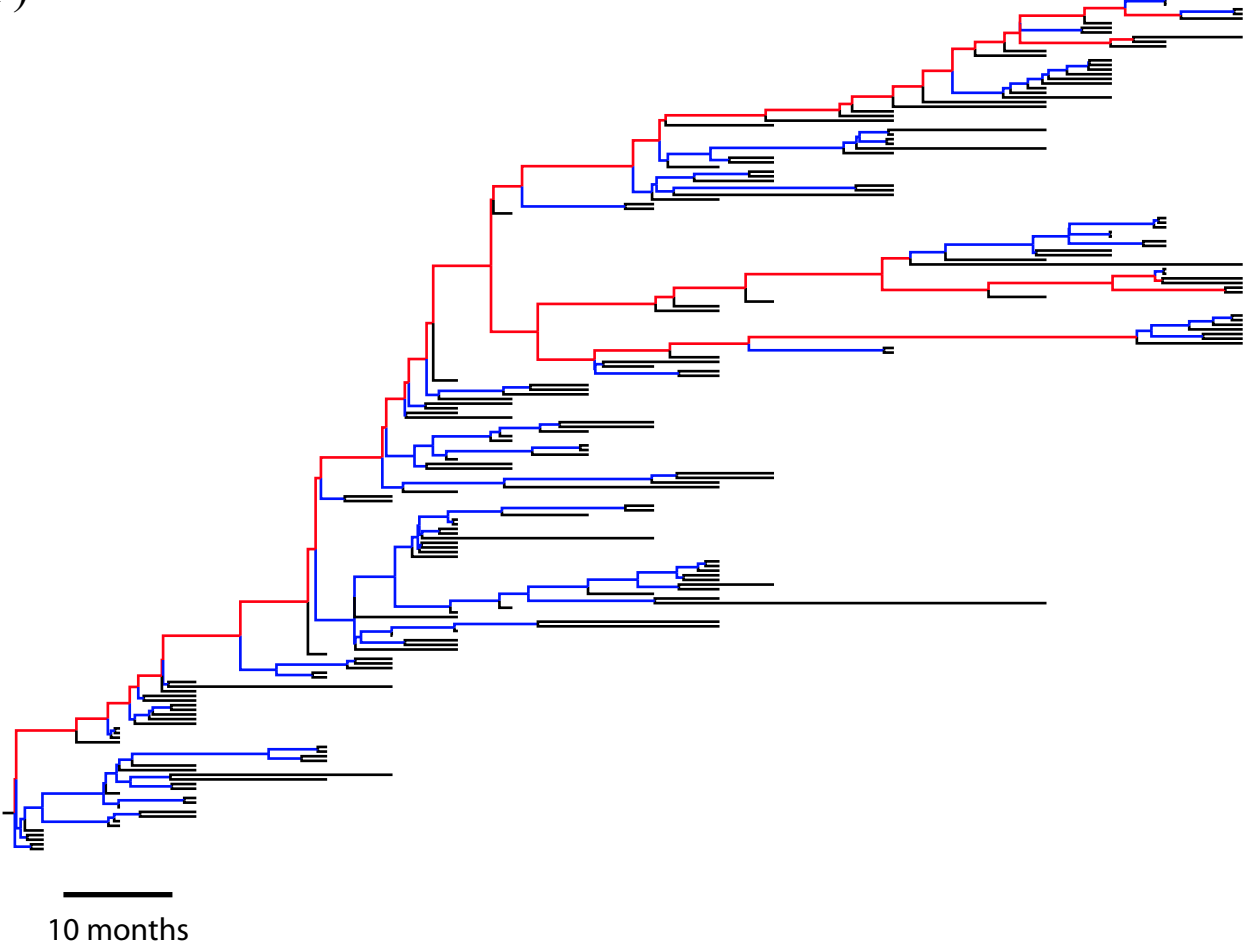

Figure S1

G)

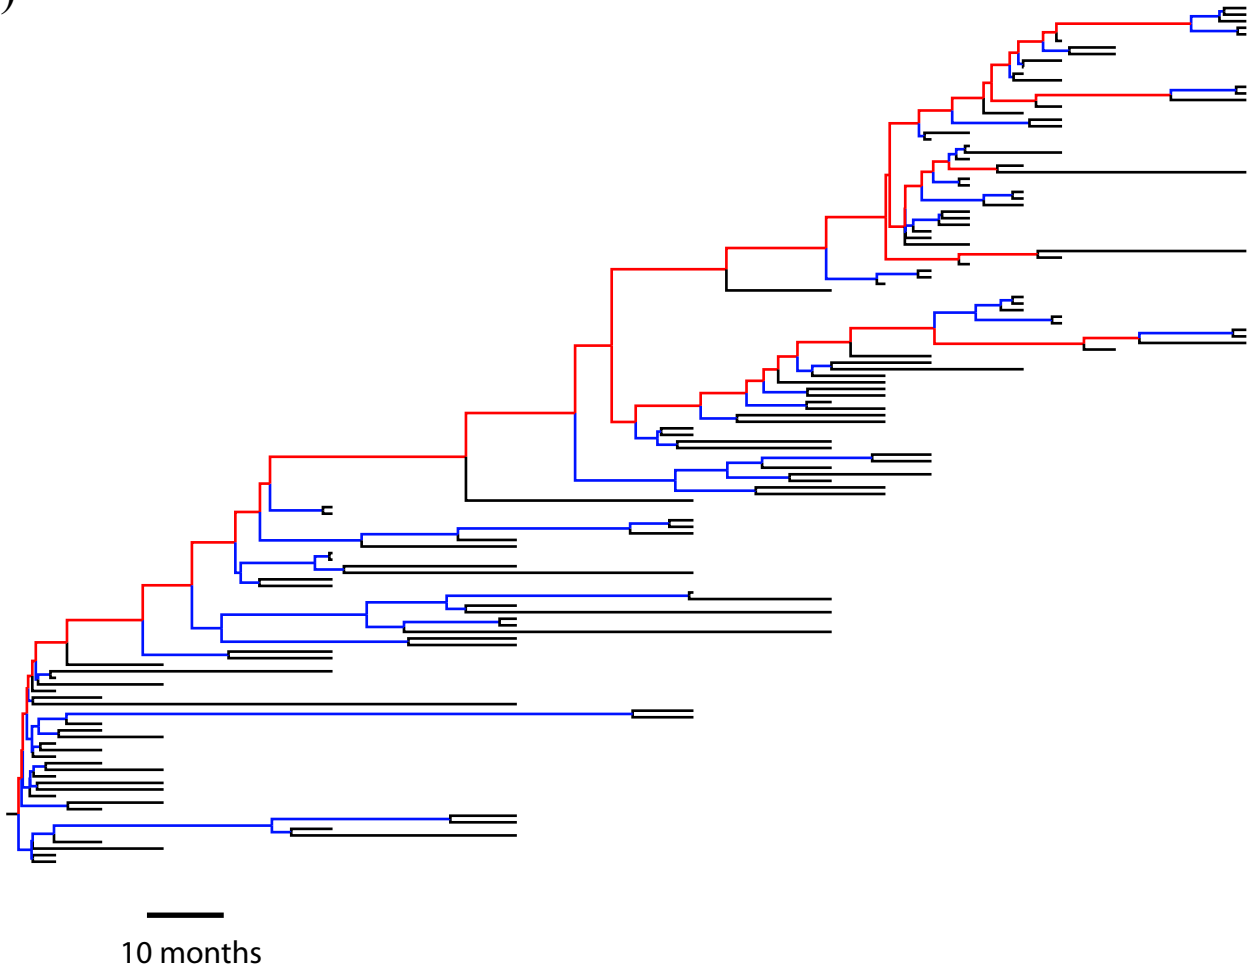

H)

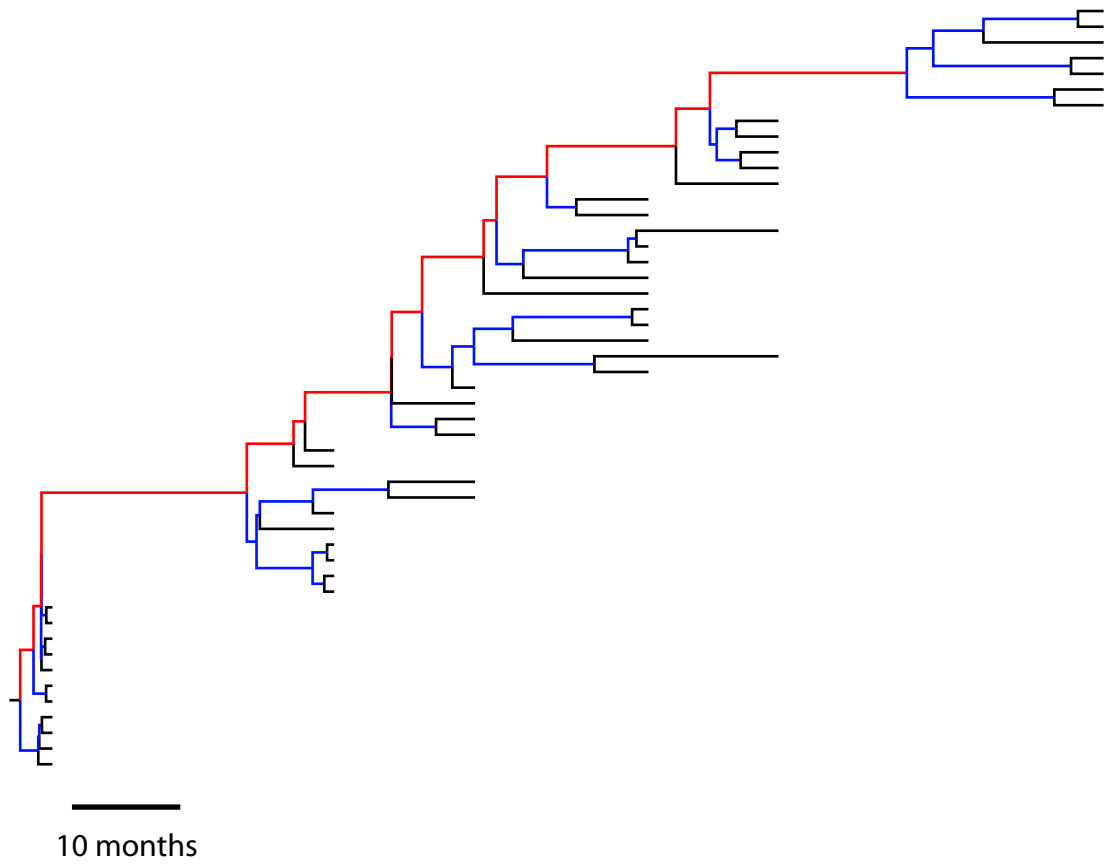

Supplement: pcbi.0030029.sg001.pdf [file pcbi.0030029.sg001.pdf]

Figure S2

A)

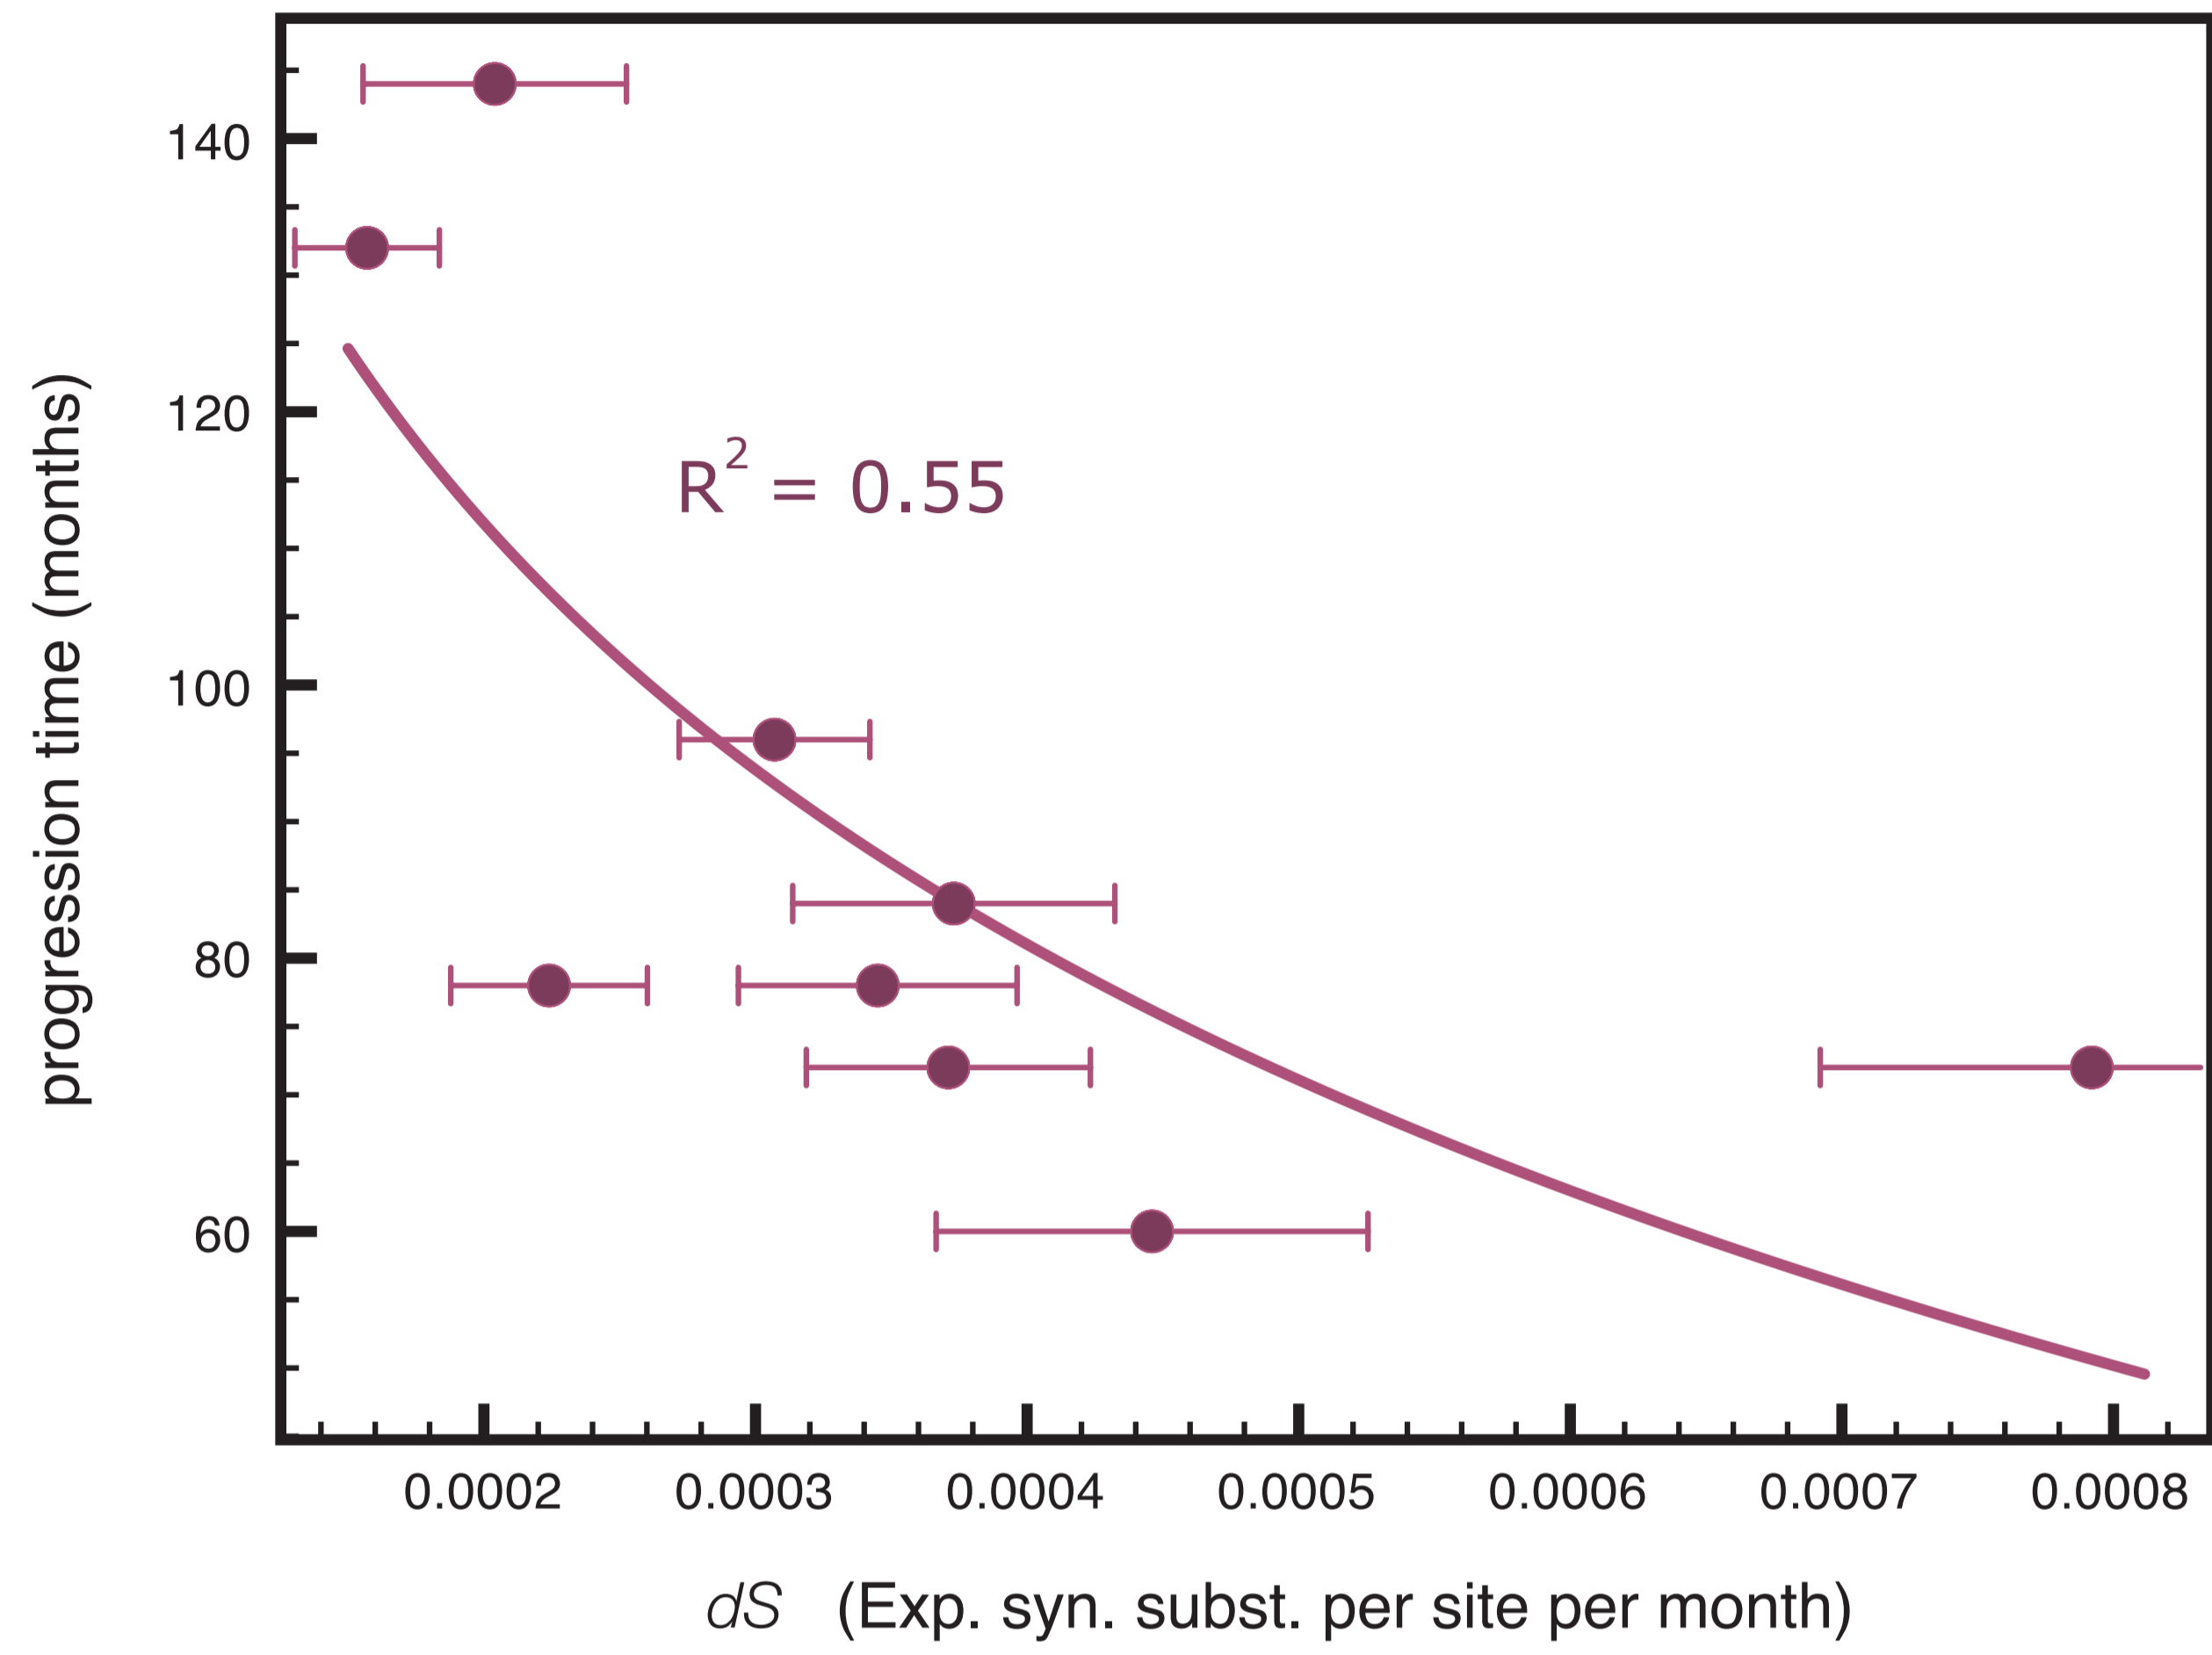

B)

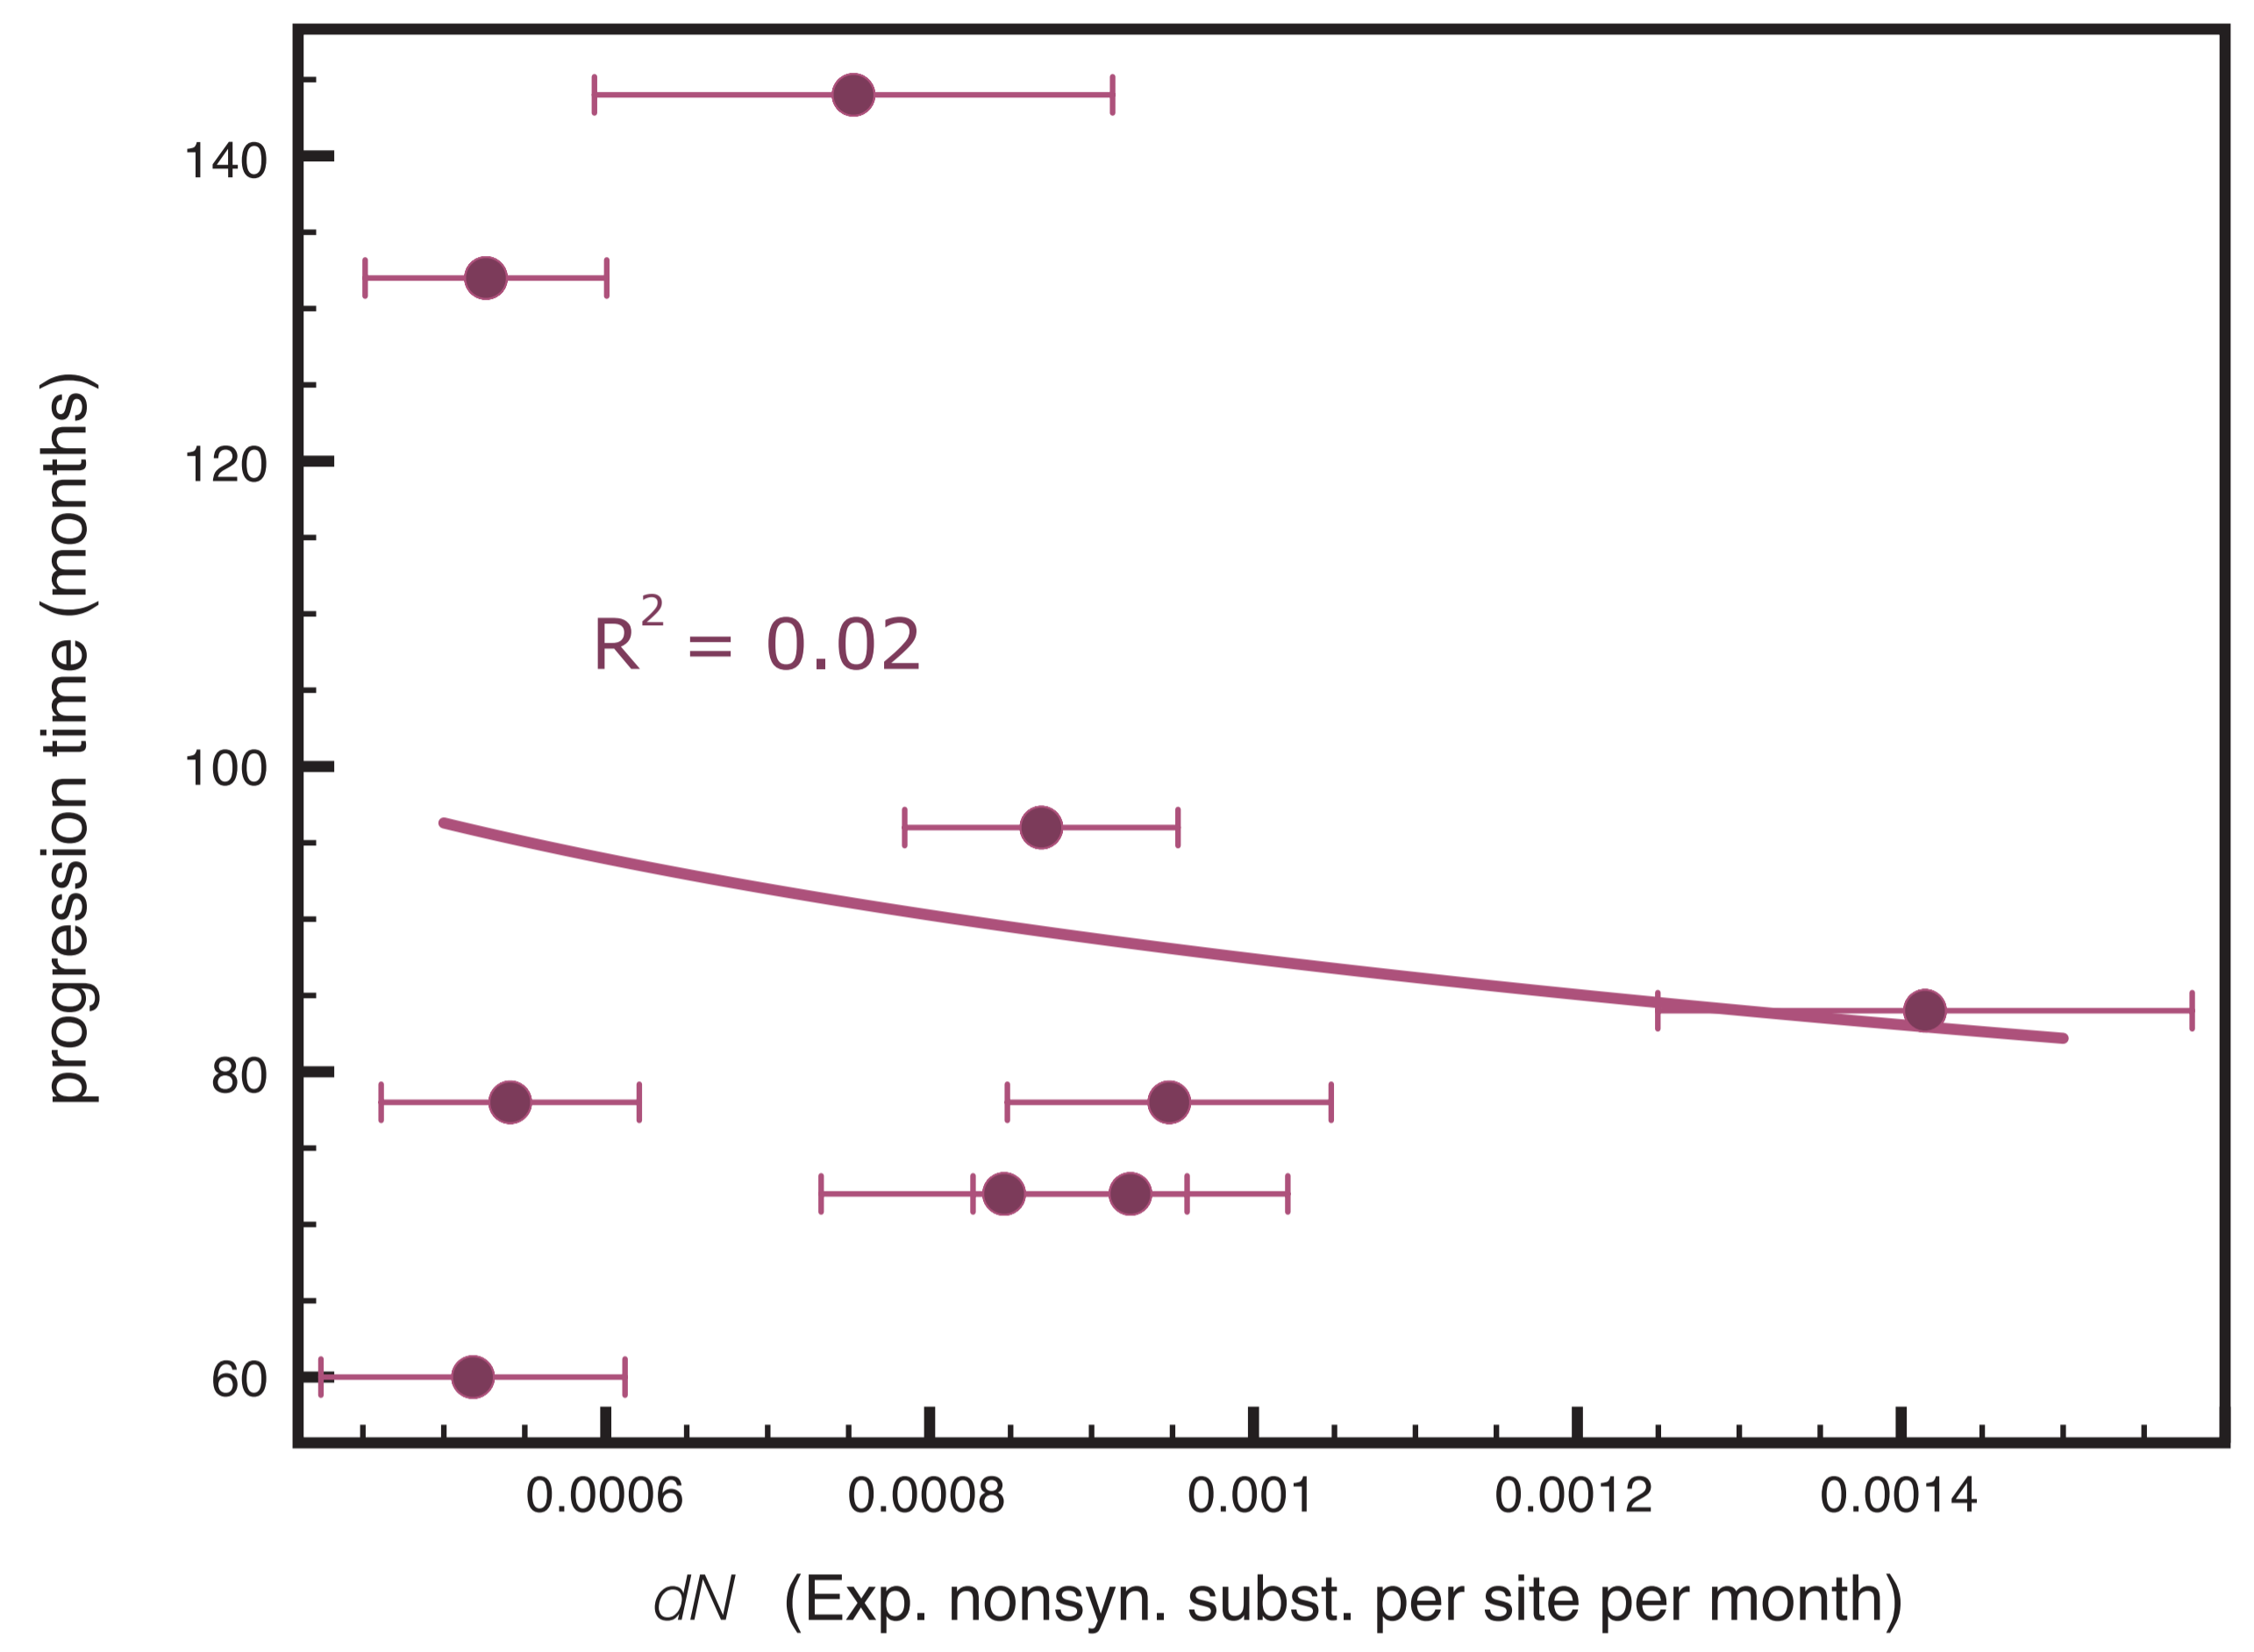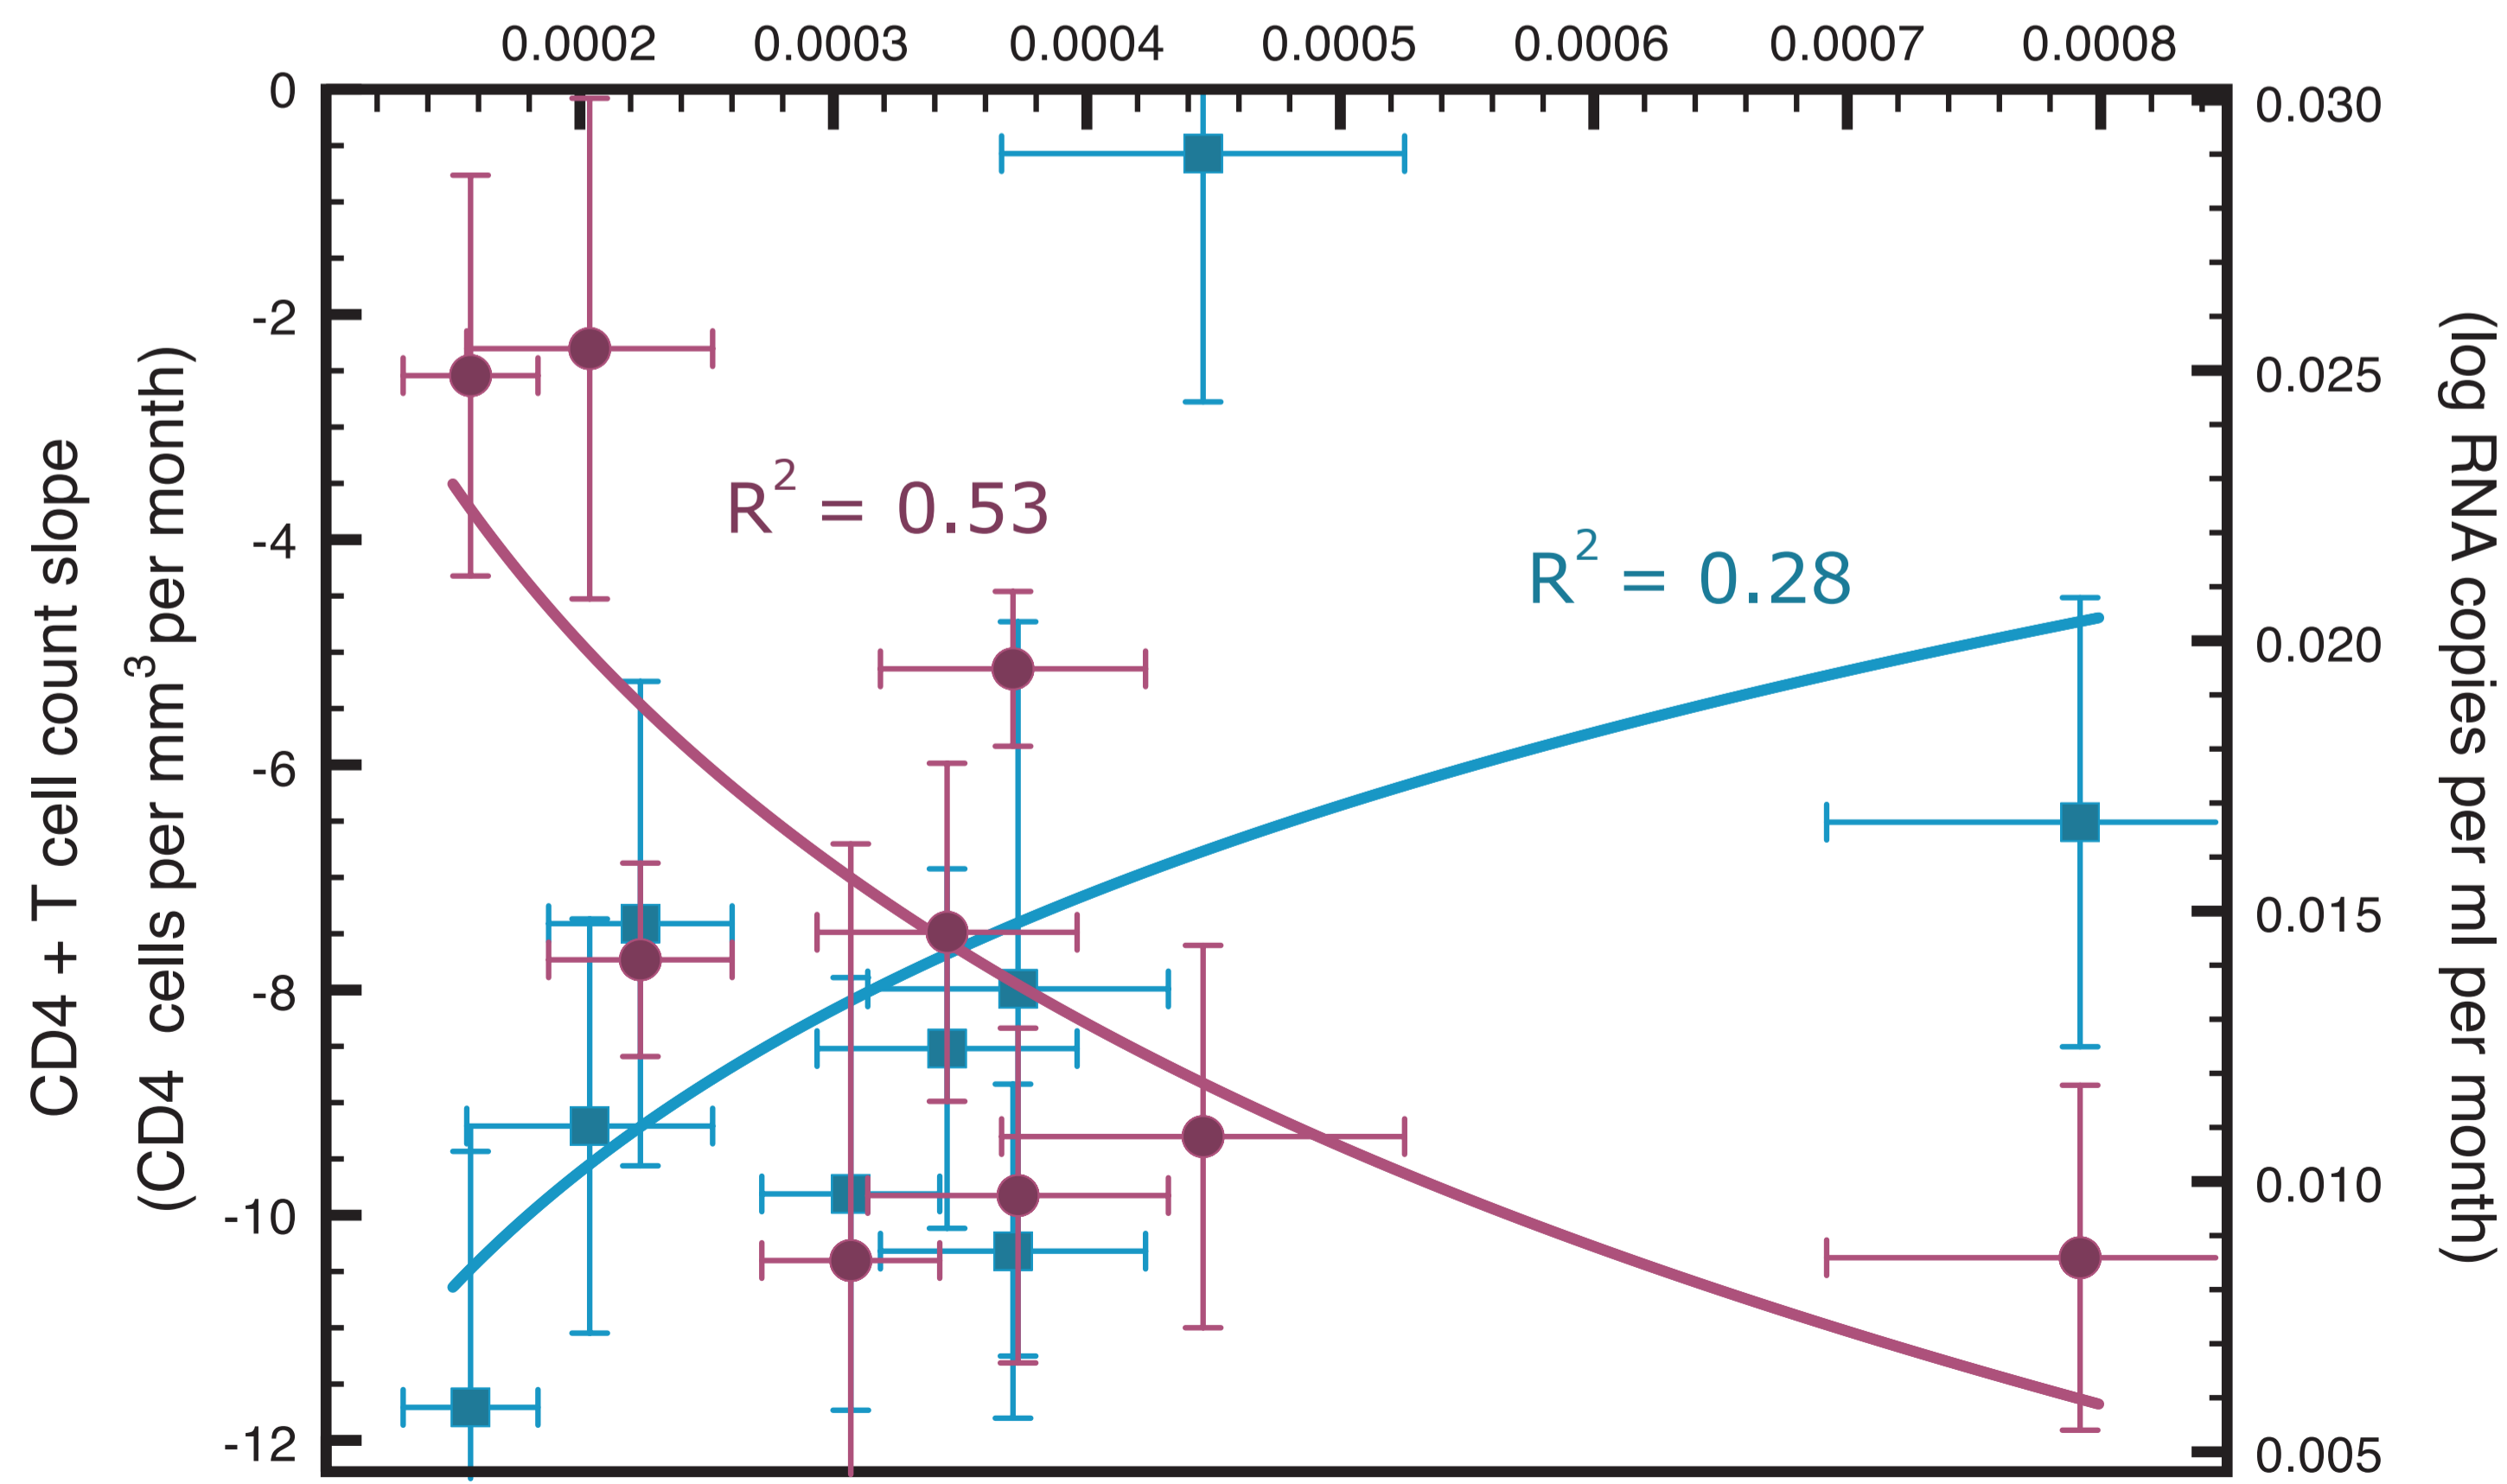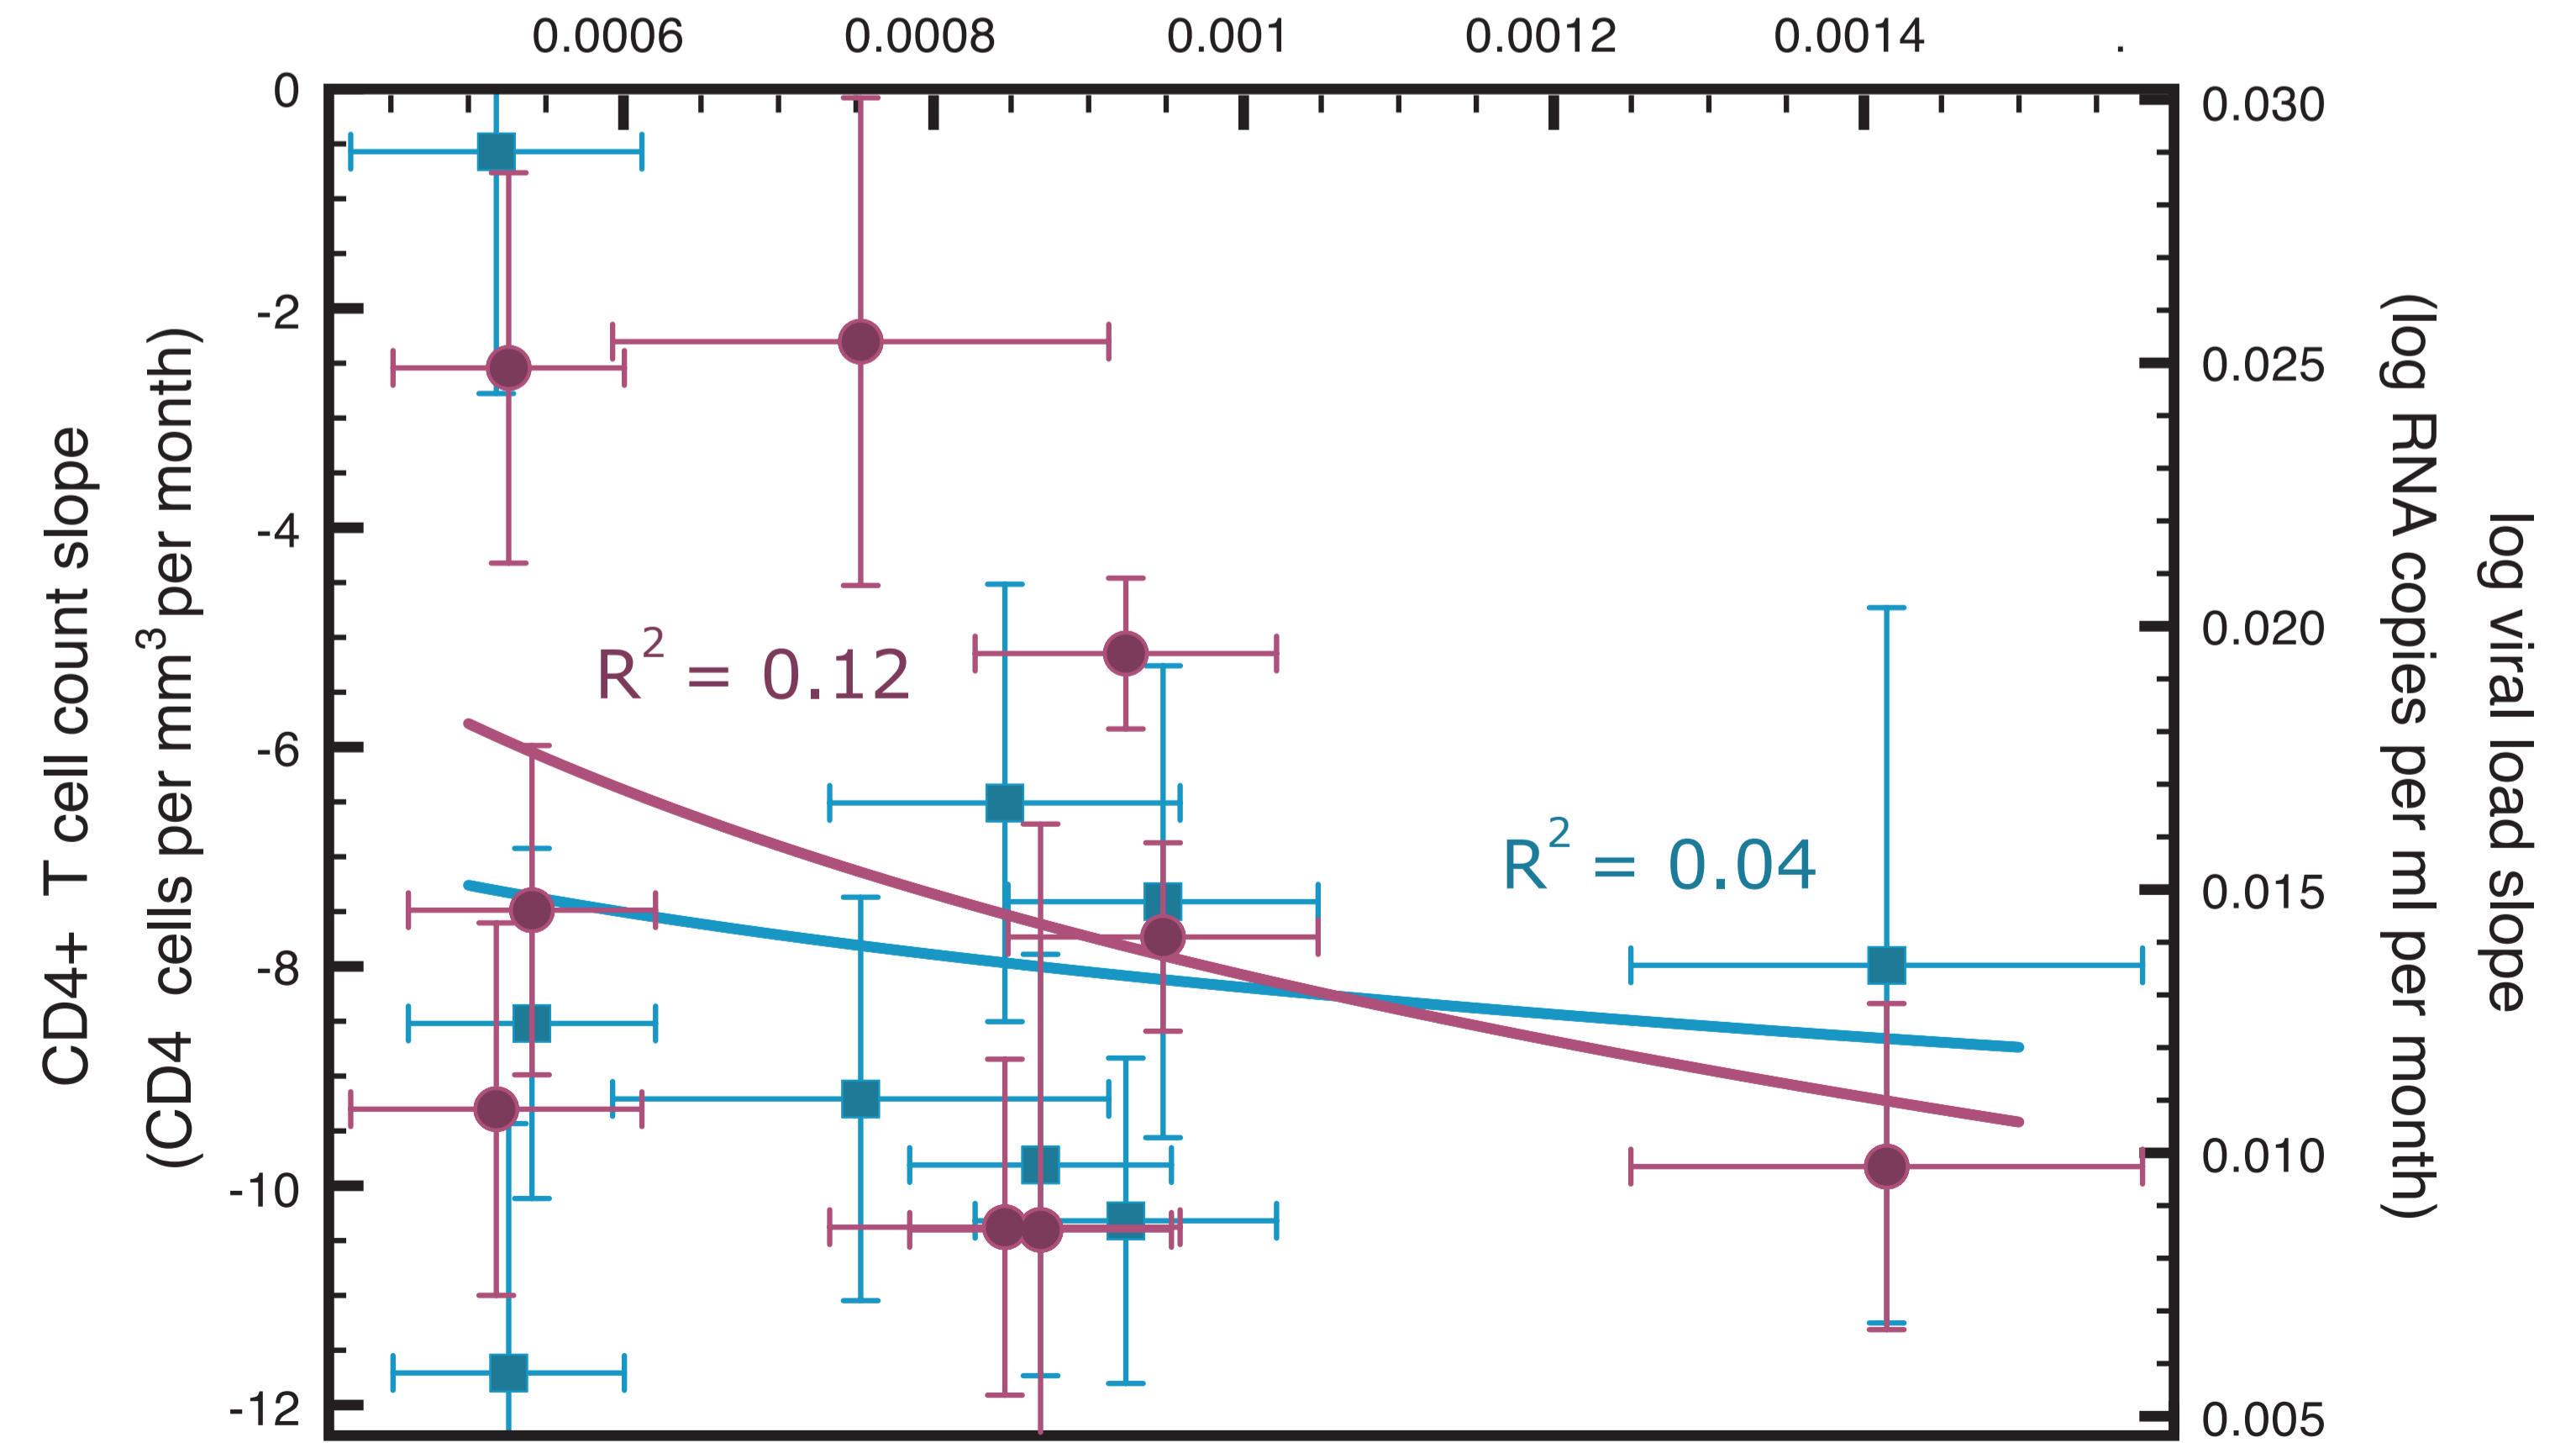

Supplement: pcbi.0030029.sg002.pdf [file pcbi.0030029.sg002.pdf]

Figure S3

A)

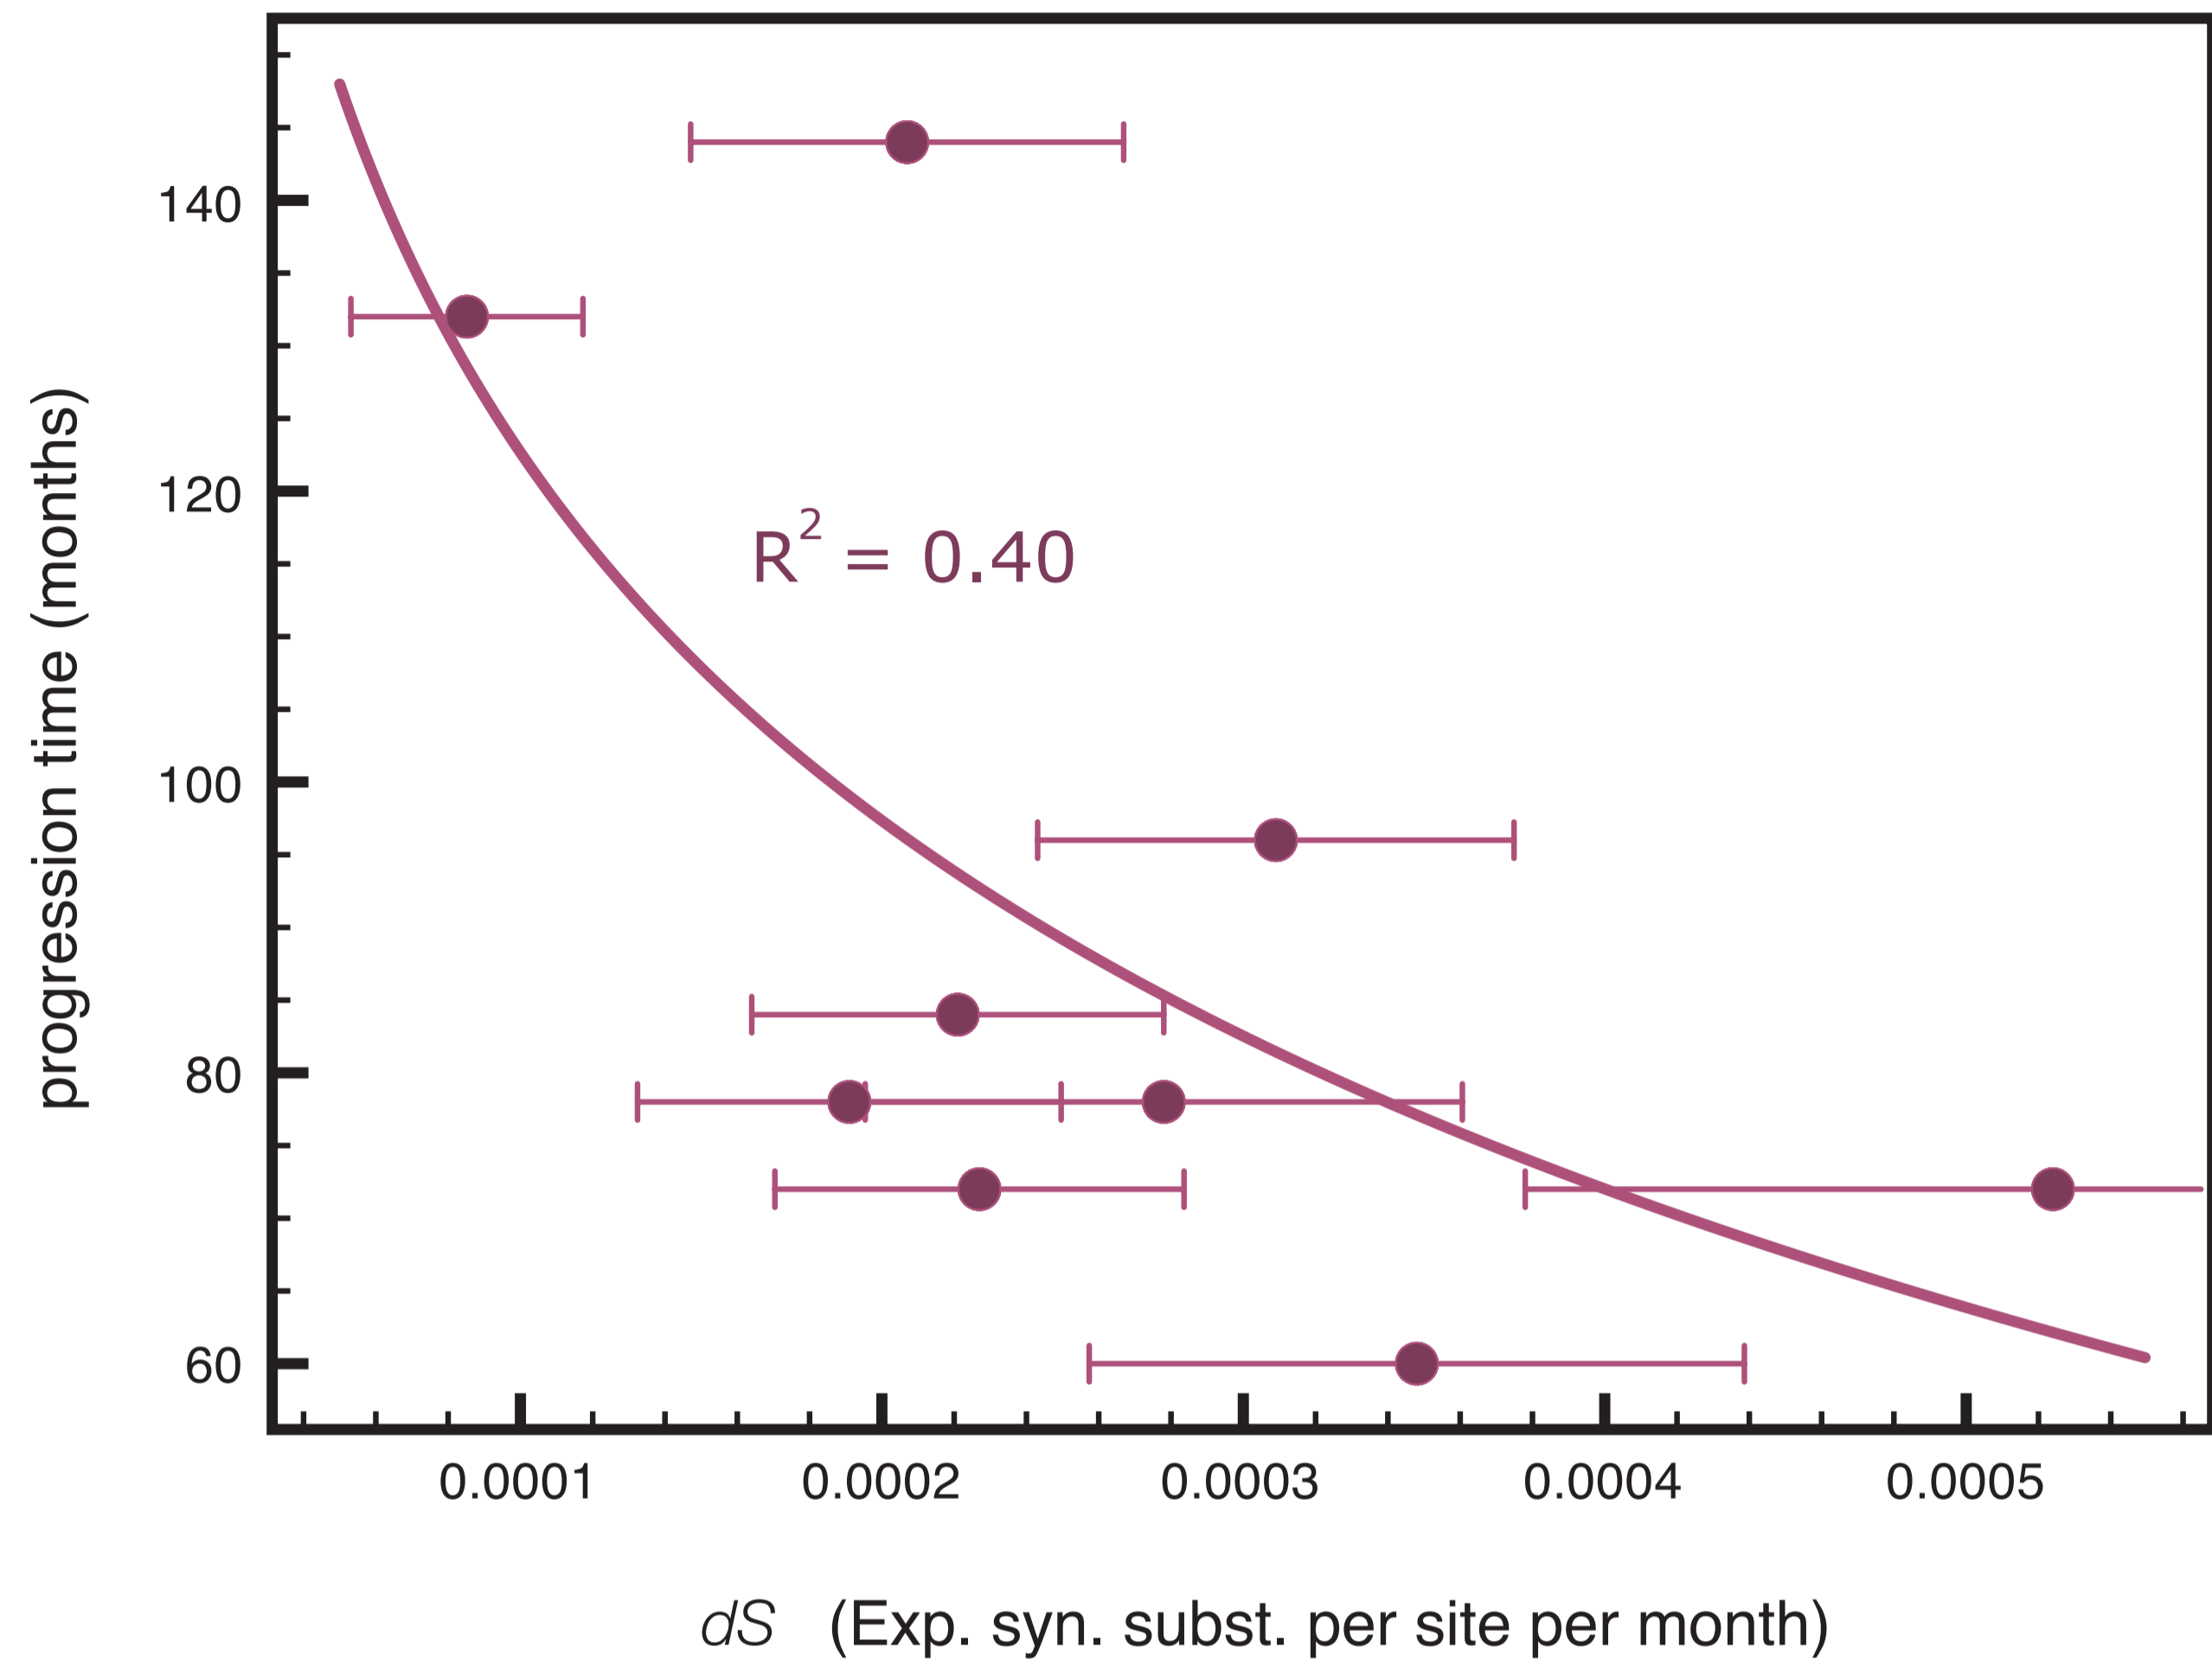

B)

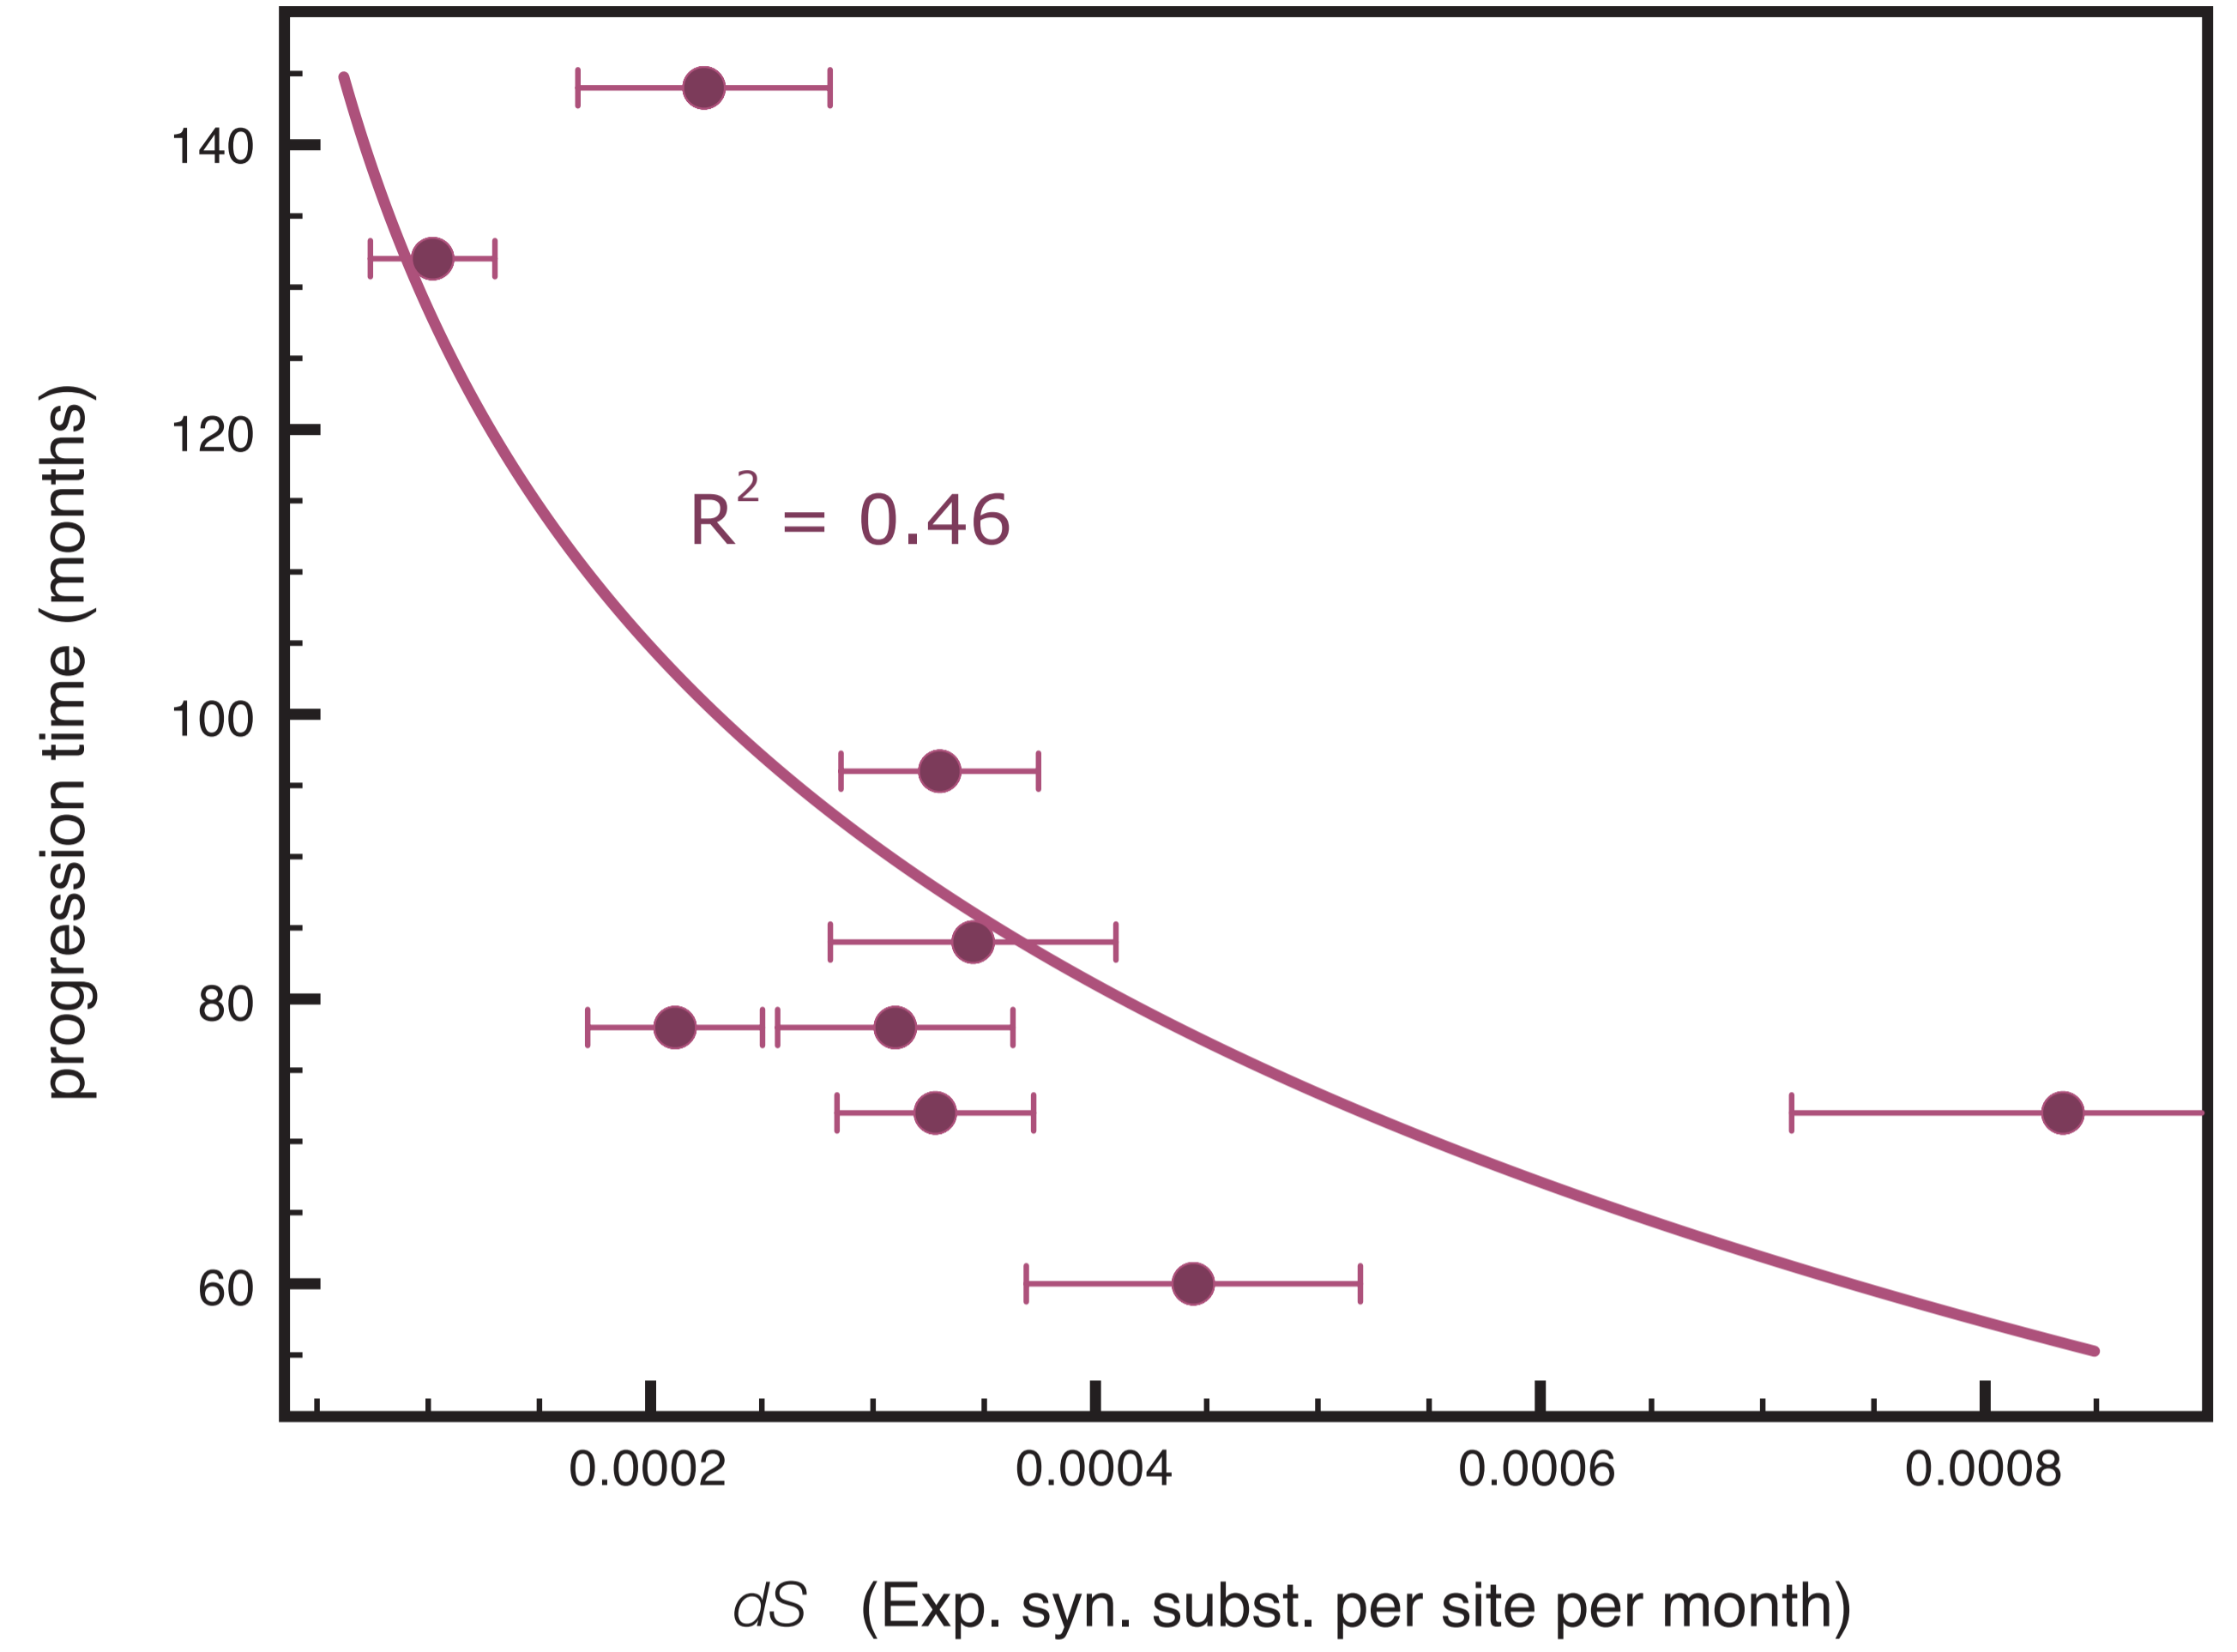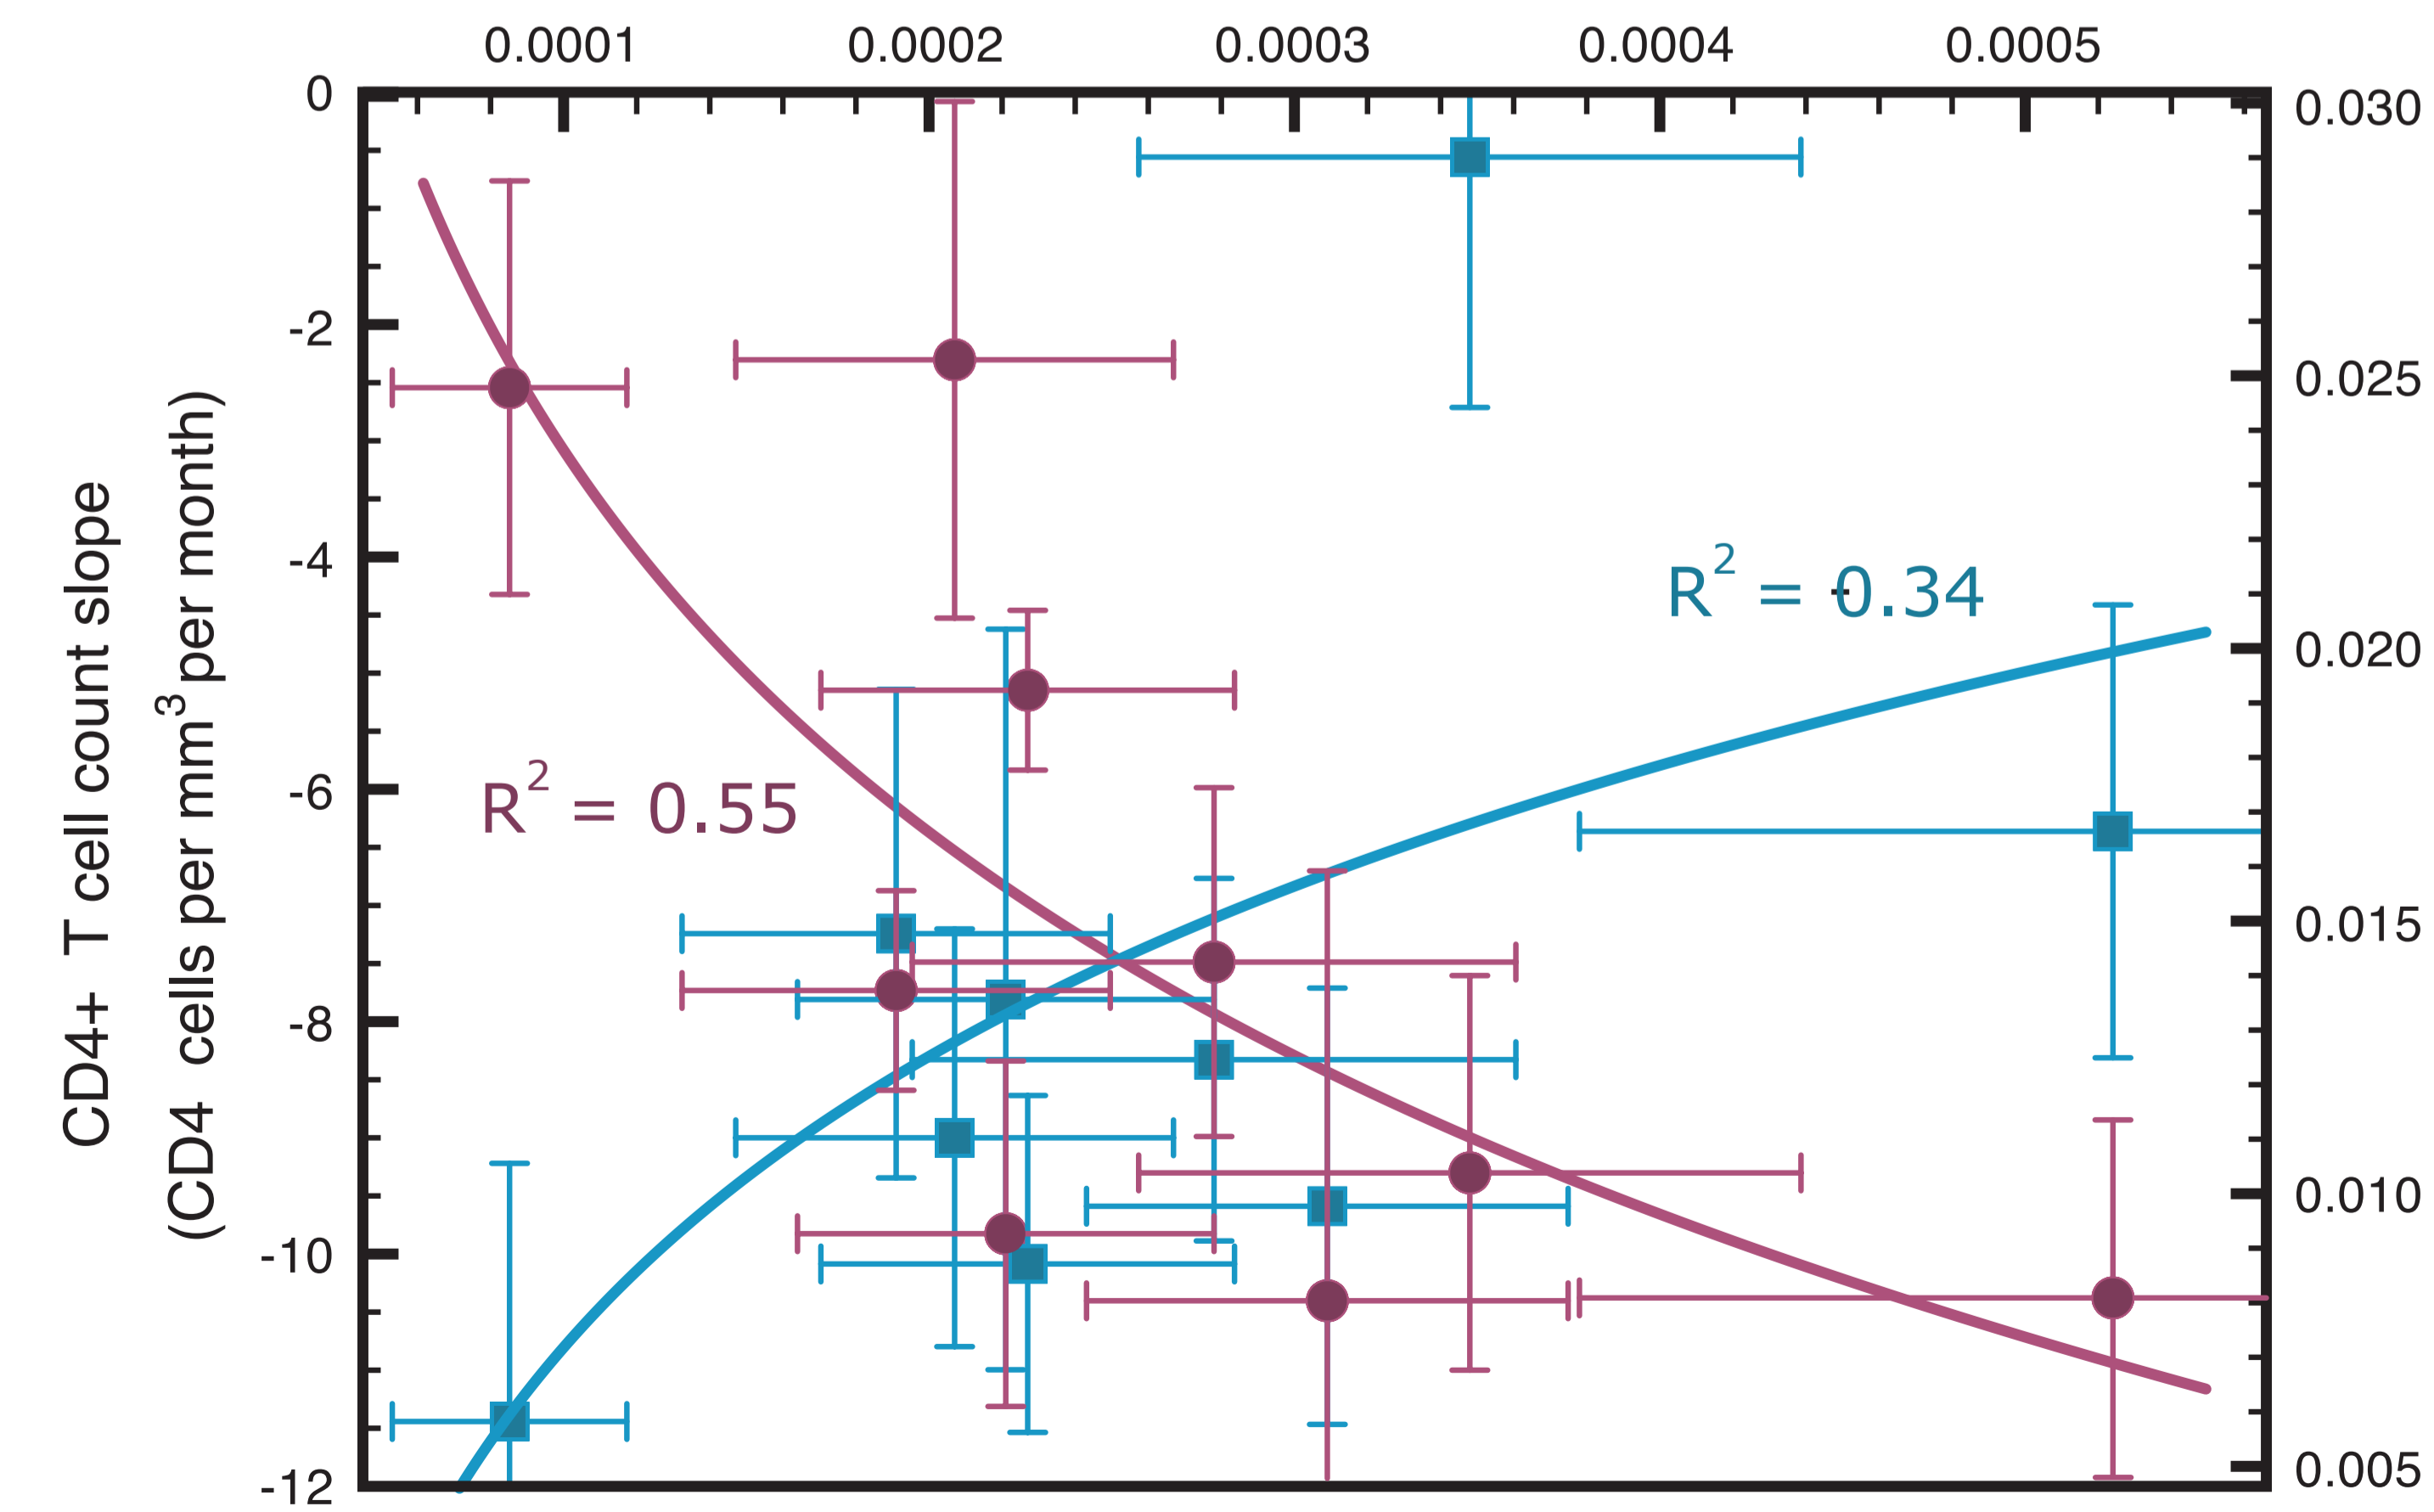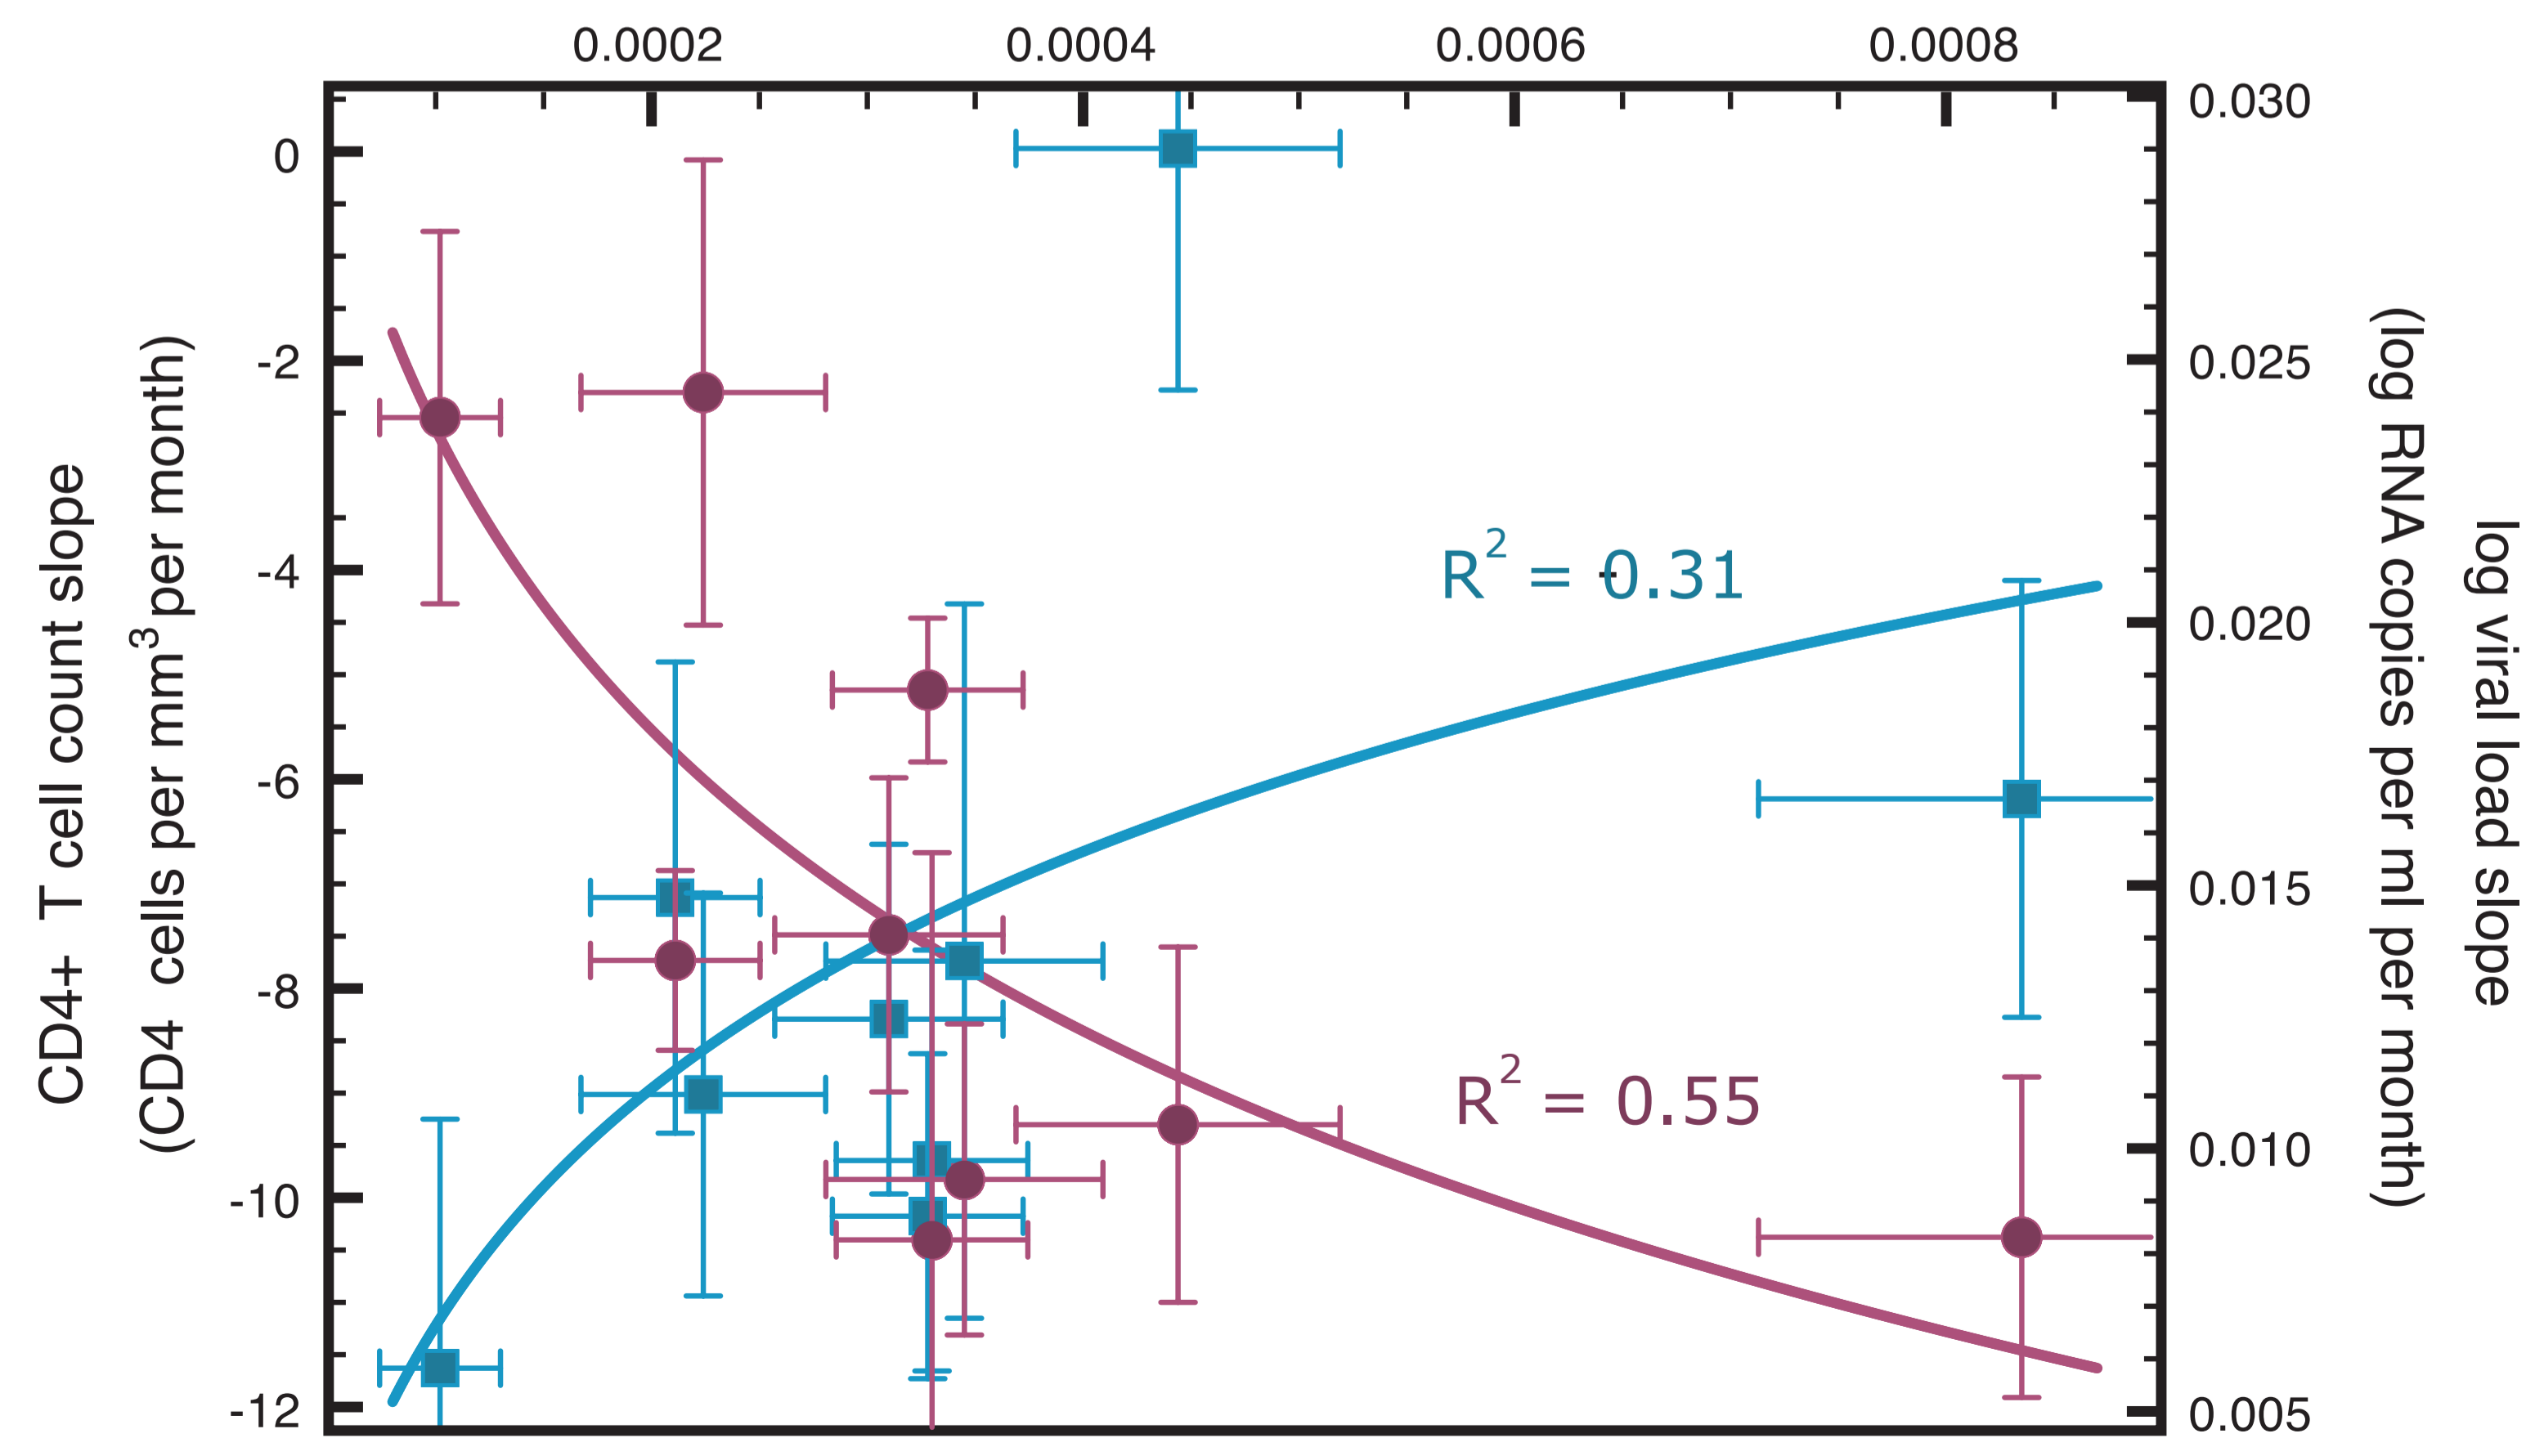

Supplement: pcbi.0030029.sg003.pdf [file pcbi.0030029.sg003.pdf]
